# Supplementary material for: Enhanced Cytotoxic Activity of PEGylated Curcumin Derivatives: Synthesis, Structure–Activity Evaluation, and Biological Activity
Source: MDPI journal article supplement (doi:10.3390/ijms24021467), 2023-01-11
Supplement: s1 [file s1]

# Enhanced Cytotoxic Activity of PEGylated Curcumin Derivatives: Synthesis, Structure–Activity Evaluation, and Biological Activity

Dawid Lazewski <sup>1</sup>, Malgorzata Kucinska <sup>2,\*</sup>, Edward Potapskiy <sup>1</sup>, Joanna Kuzminska <sup>3</sup>, Lukasz Popenda <sup>4</sup>, Artur Tezyk <sup>5</sup>, Tomasz Goslinski <sup>1</sup>, Marcin Wierzchowski <sup>1</sup> and Marek Murias <sup>2,6,\*</sup>

<sup>1</sup> Department of Chemical Technology of Drugs, Poznan University of Medical Sciences, Grunwaldzka 6 Street, 60-780 Poznan, Poland; lazewskidawid@gmail.com (D.L.); potapskiyed@gmail.com (E.P.); tomasz.goslinski@ump.edu.pl (T.G.); mwierzch@ump.edu.pl (M.W.)

<sup>2</sup> Department of Toxicology, Poznan University of Medical Sciences, Dojazd 30 Street, 60-631 Poznan, Poland

<sup>3</sup> Department of Pharmaceutical Chemistry, Poznan University of Medical Sciences, Grunwaldzka 6 Street, 60-780 Poznan, Poland; joanna.kuzminska@student.ump.edu.pl

<sup>4</sup> NanoBioMedical Centre, Adam Mickiewicz University, Wszechnicy Piastowskiej 3 Street, 61-614 Poznan, Poland; lpopenda@amu.edu.pl

<sup>5</sup> Department of Forensic Medicine, Poznan University of Medical Sciences, Rokietnicka 10 Street, 60-806 Poznan, Poland; atezyk@ump.edu.pl

<sup>6</sup> Center for Advanced Technology, Adam Mickiewicz University, Uniwersytetu Poznanskiego 10 Street, 61-614 Poznan, Poland

\* Correspondence: kucinska@ump.edu.pl (M.K.); marek.murias@ump.edu.pl (M.M.)

## Supporting Information

**Citation:** Lazewski, D.; Kucinska, M.; Potapskiy, E.; Kuzminska, J.; Popenda, L.; Tezyk, A.; Goslinski, T.; Wierzchowski, M.; Murias, M. Enhanced Cytotoxic Activity of PEGylated Curcumin Derivatives: Synthesis, Structure–Activity Evaluation, and Biological Activity. *Int. J. Mol. Sci.* **2023**, *24*, 1467. <https://doi.org/10.3390/ijms24021467>

Academic Editor(s): Hwan-Suck Chung

Received: 9 November 2022

Revised: 25 December 2022

Accepted: 6 January 2023

Published: 11 January 2023

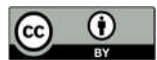

**Copyright:** © 2023 by the authors.

Submitted for possible open access publication under the terms and conditions of the Creative Commons Attribution (CC BY) license (<https://creativecommons.org/licenses/by/4.0/>).

## Table of contents

|                                |    |
|--------------------------------|----|
| S1 – NMR spectroscopy.....     | 2  |
| S2 – Mass spectrometry .....   | 22 |
| S3 – UV-vis spectroscopy ..... | 26 |
| S4 – HPLC data.....            | 28 |

## S1 – NMR spectroscopy

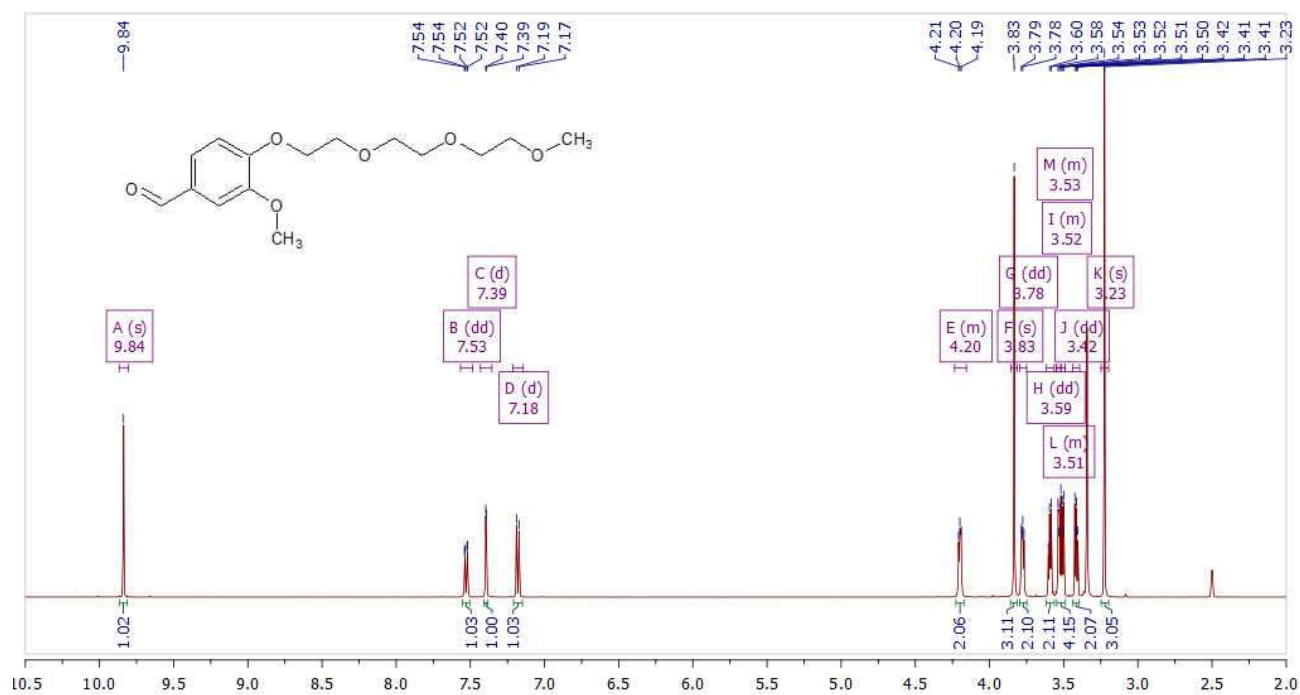

Figure S1. <sup>1</sup>H NMR spectrum of aldehyde 1.

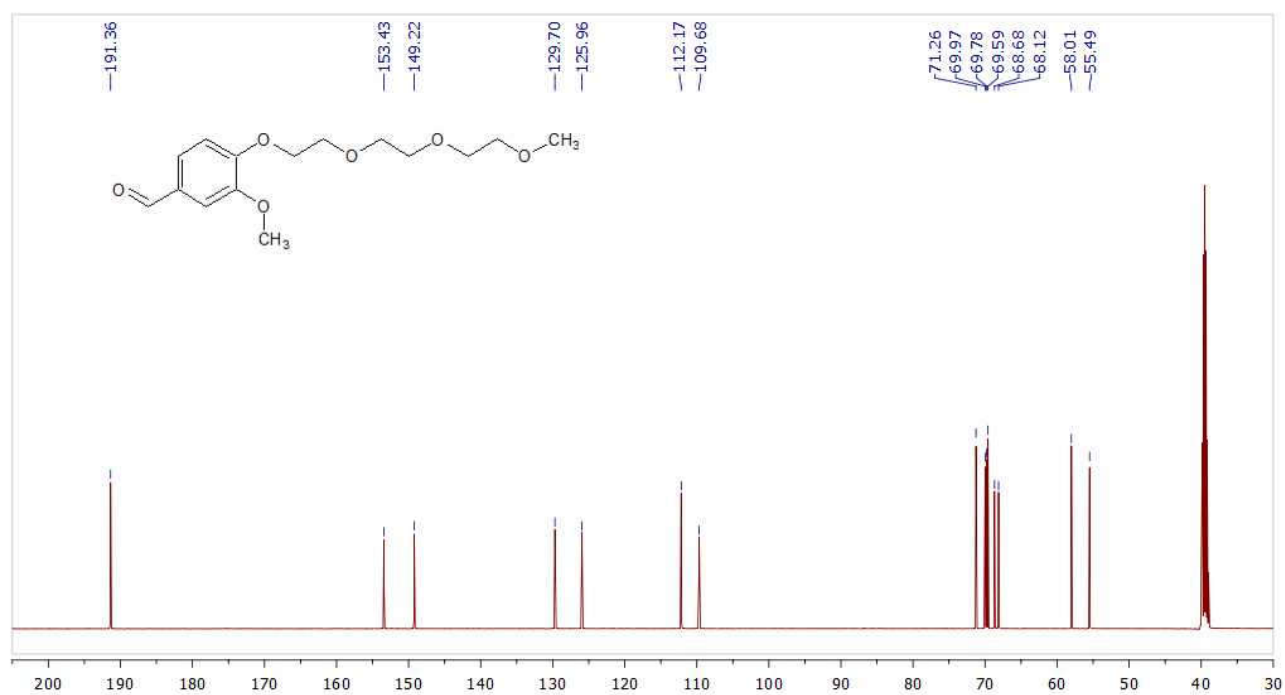

Figure S2. <sup>13</sup>C NMR spectrum of aldehyde 1.

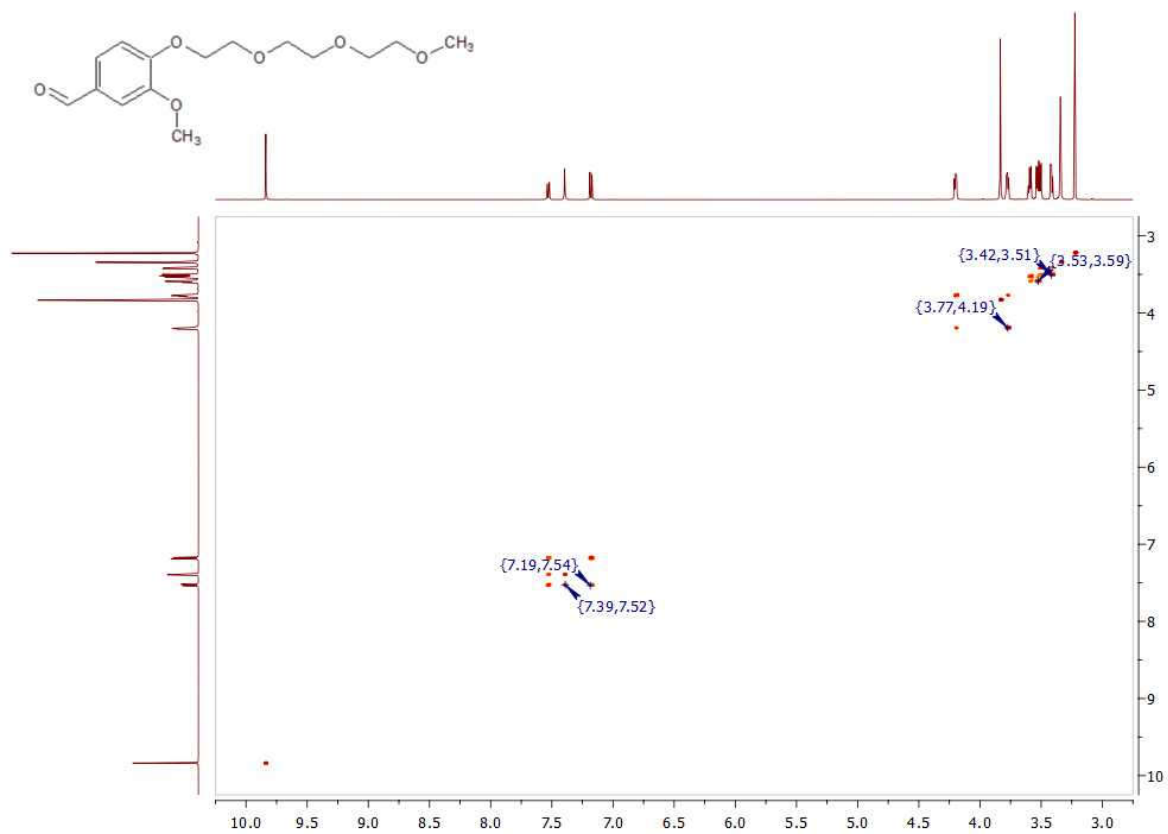

**Figure S3.**  $^1\text{H}$ - $^1\text{H}$  COSY spectrum of aldehyde 1.

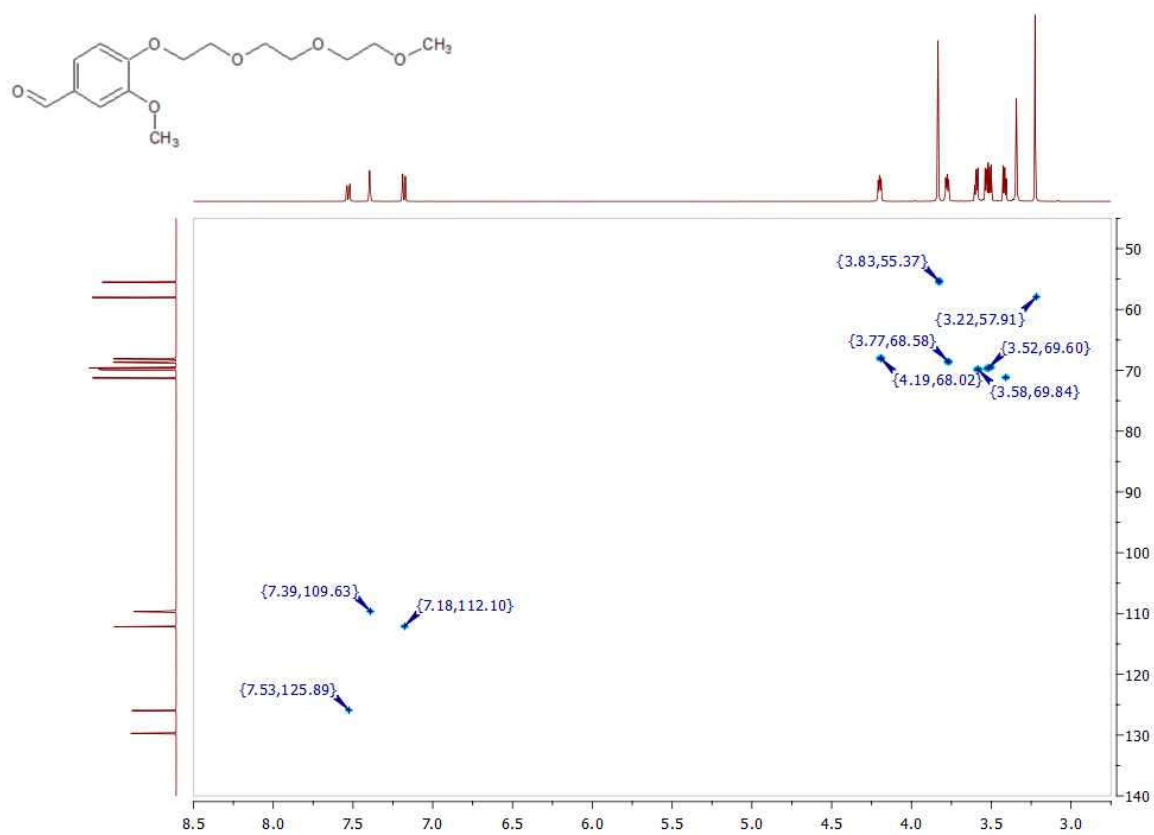

**Figure S4.**  $^1\text{H}$ - $^{13}\text{C}$  HSQC spectrum of aldehyde 1.

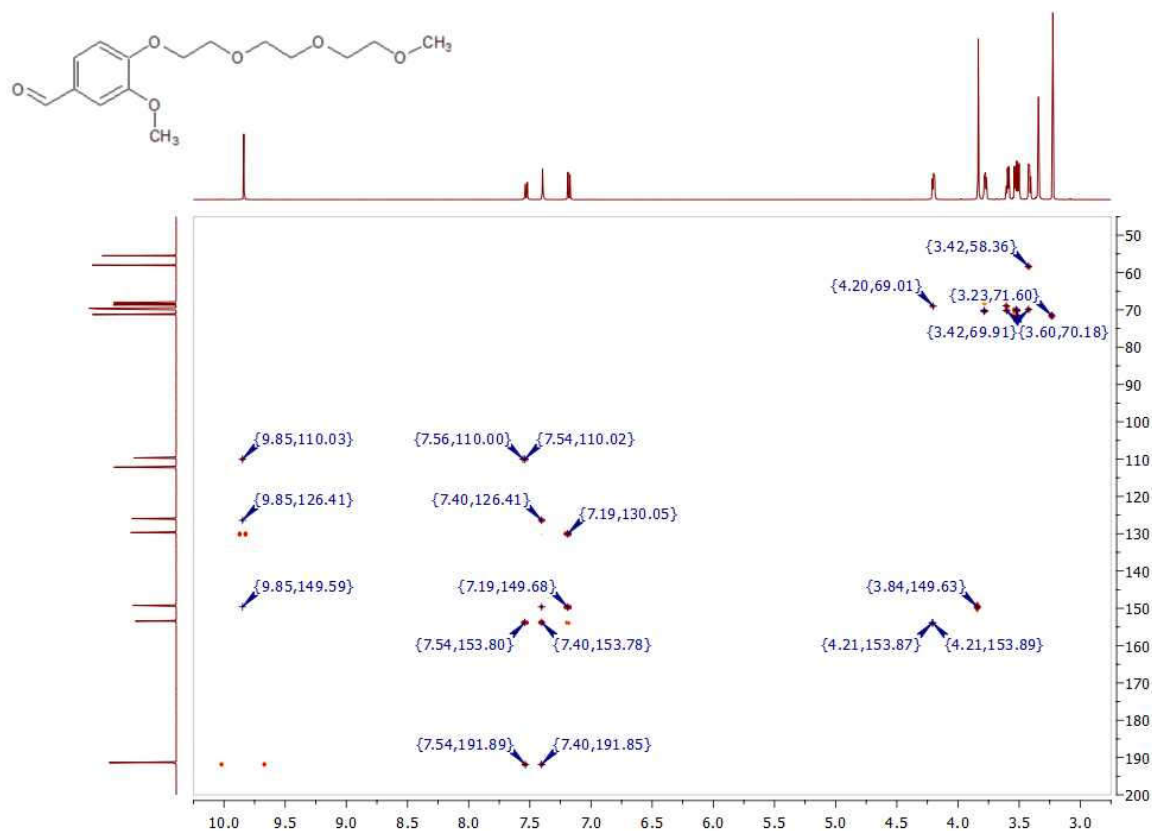

Figure S5.  $^1\text{H}$ - $^{13}\text{C}$  HMBC spectrum of aldehyde 1.

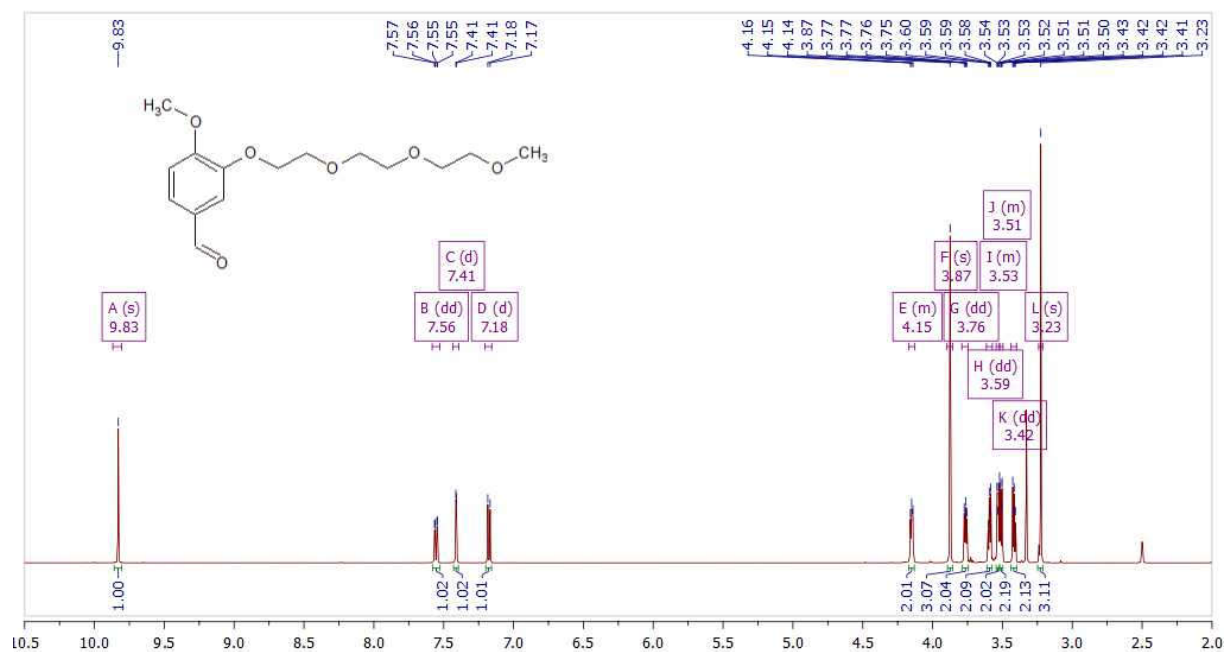

Figure S6.  $^1\text{H}$  NMR spectrum of aldehyde 2.

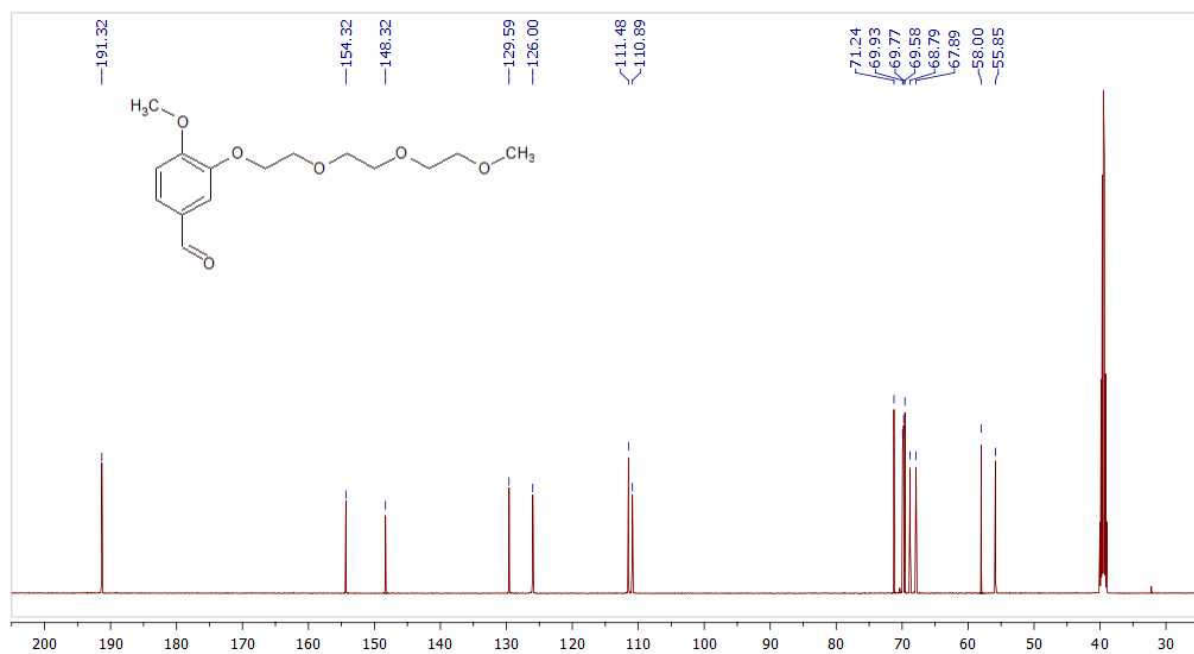

Figure S7.  $^{13}\text{C}$  NMR spectrum of aldehyde 2.

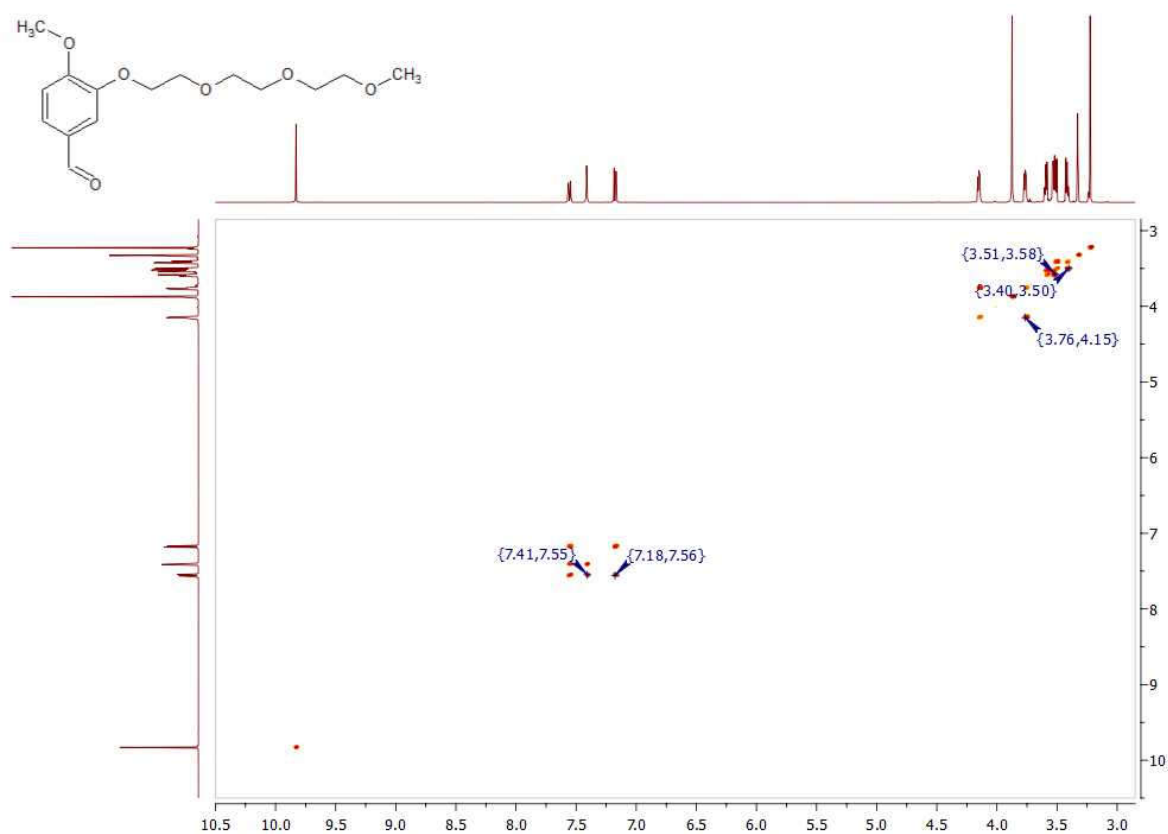

Figure S8.  $^1\text{H}$ - $^1\text{H}$  COSY spectrum of aldehyde 2.

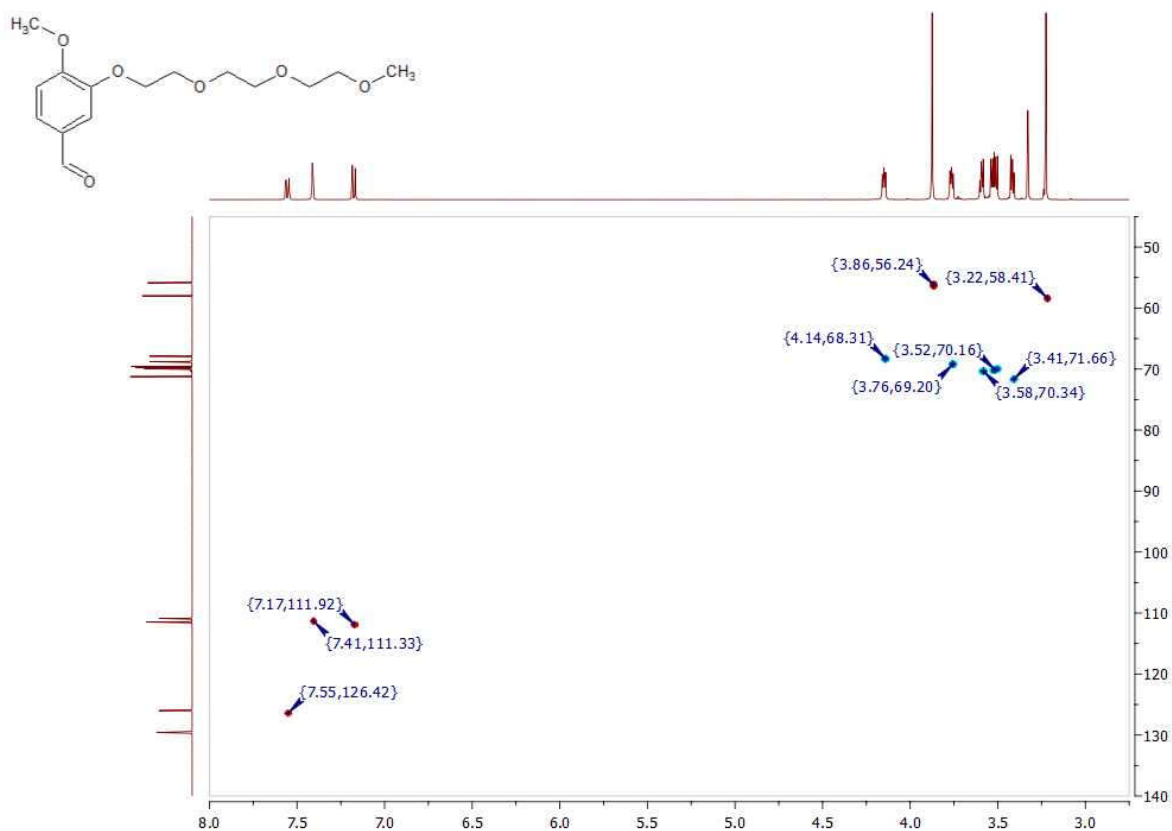

**Figure S9.** <sup>1</sup>H-<sup>13</sup>C HSQC spectrum of aldehyde 2.

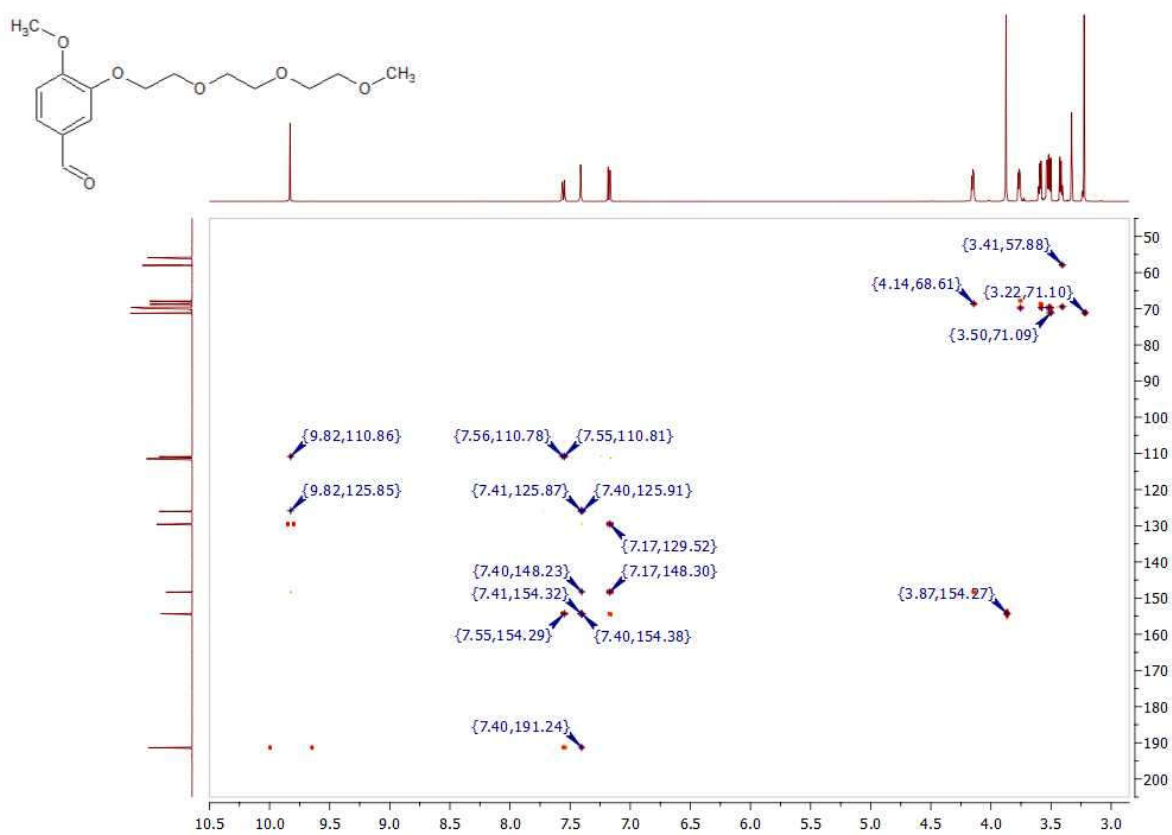

**Figure S10.** <sup>1</sup>H-<sup>13</sup>C HMBC spectrum of aldehyde 2.

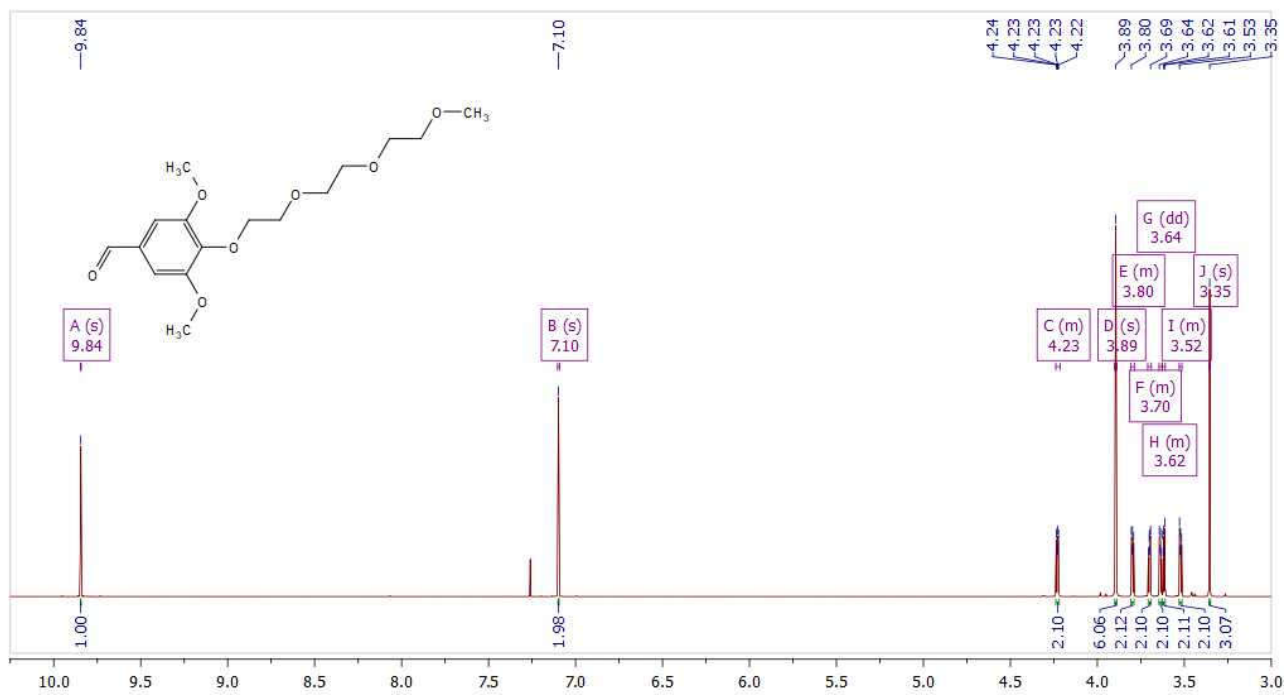

**Figure S11.** <sup>1</sup>H NMR spectrum of aldehyde 3.

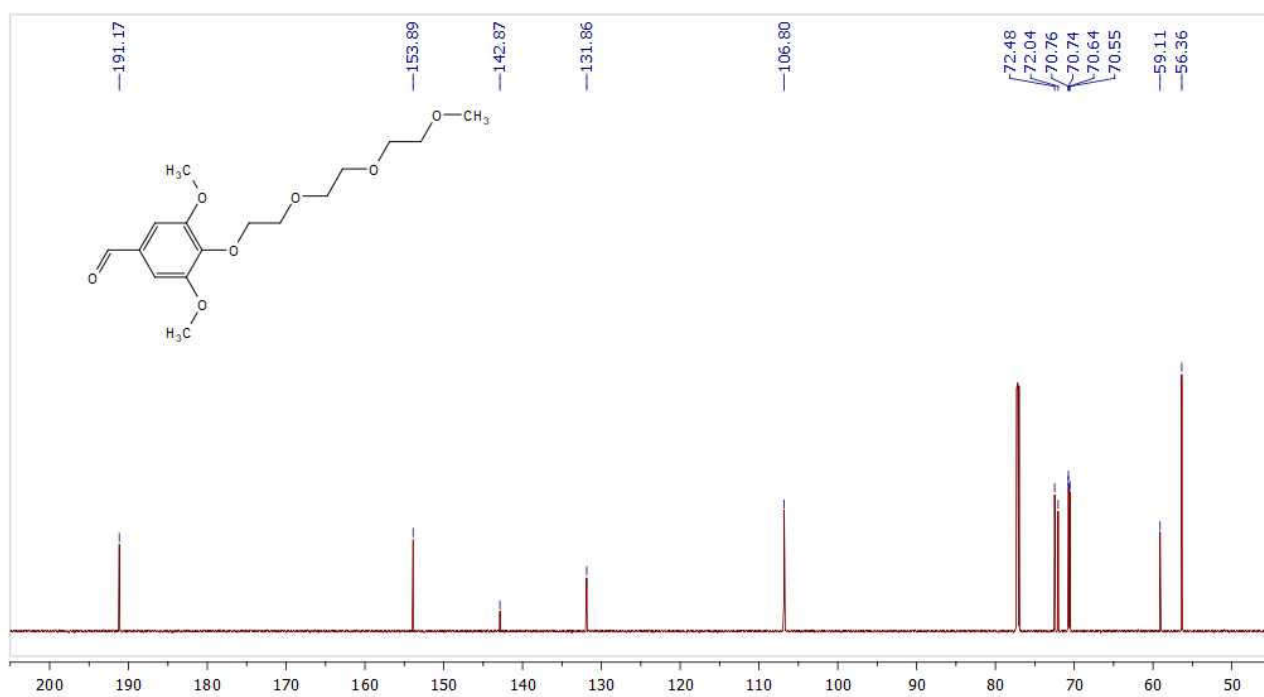

**Figure S12.** <sup>13</sup>C NMR spectrum of aldehyde 3.

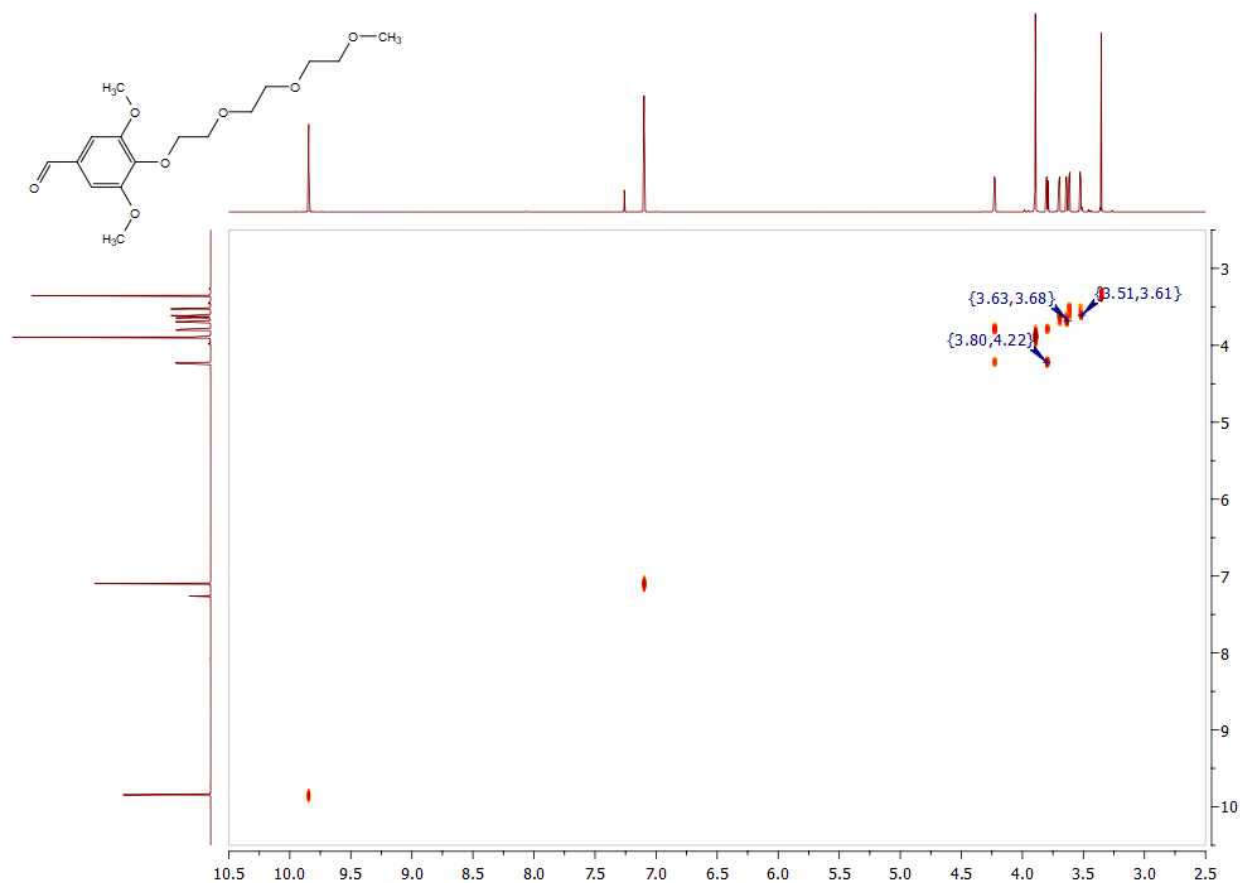

**Figure S13.**  $^1\text{H}$ - $^1\text{H}$  COSY spectrum of aldehyde 3.



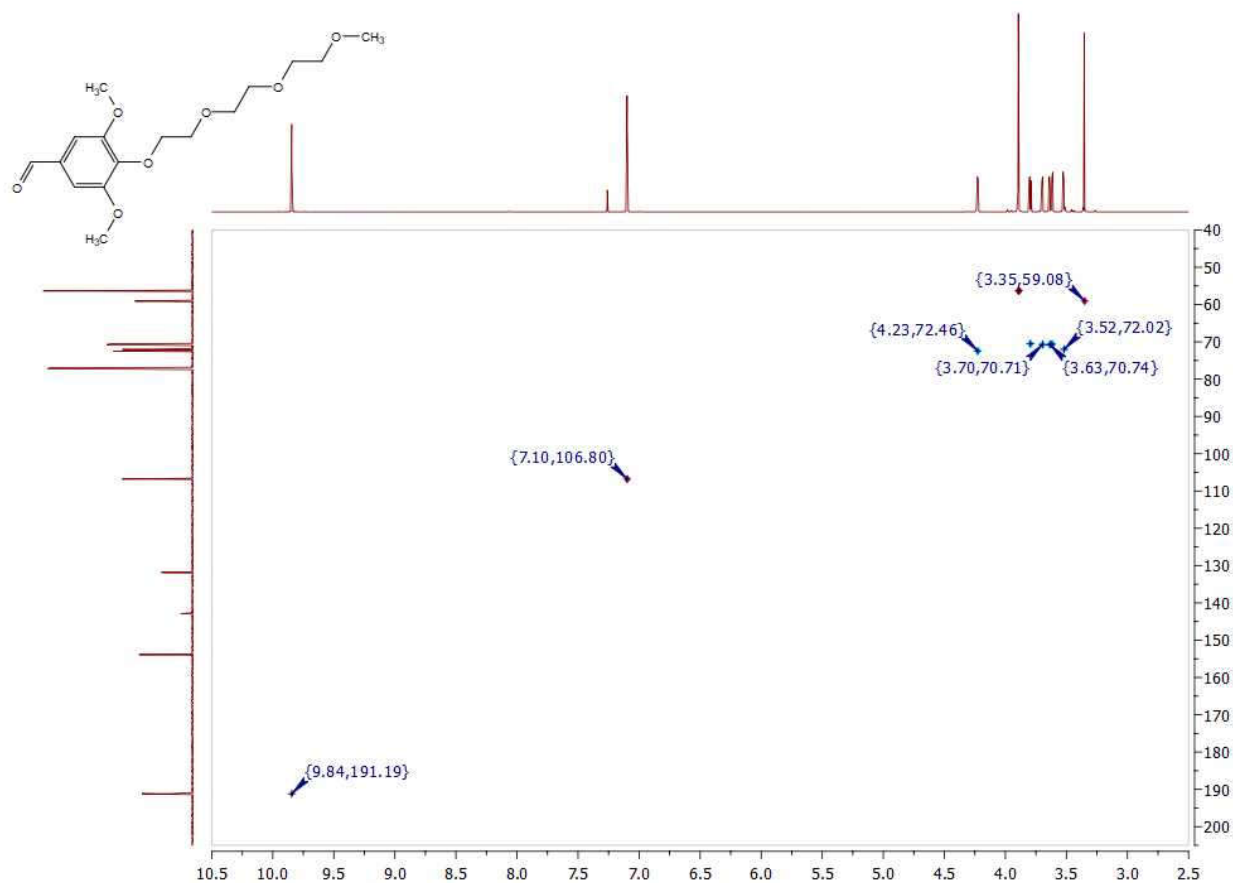

**Figure S14.** <sup>1</sup>H-<sup>13</sup>C HSQC spectrum of aldehyde 3.

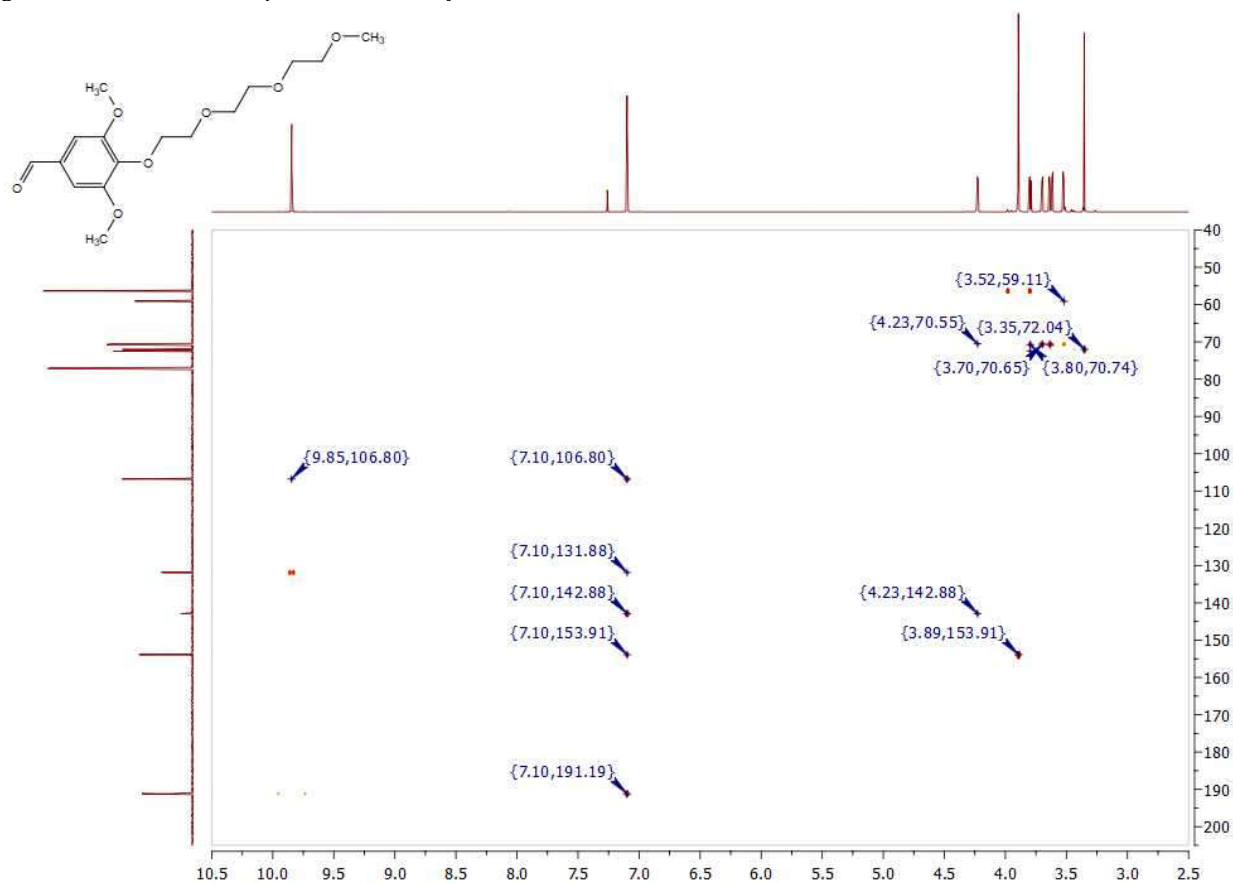

**Figure S15.** <sup>1</sup>H-<sup>13</sup>C HMBC spectrum of aldehyde 3.



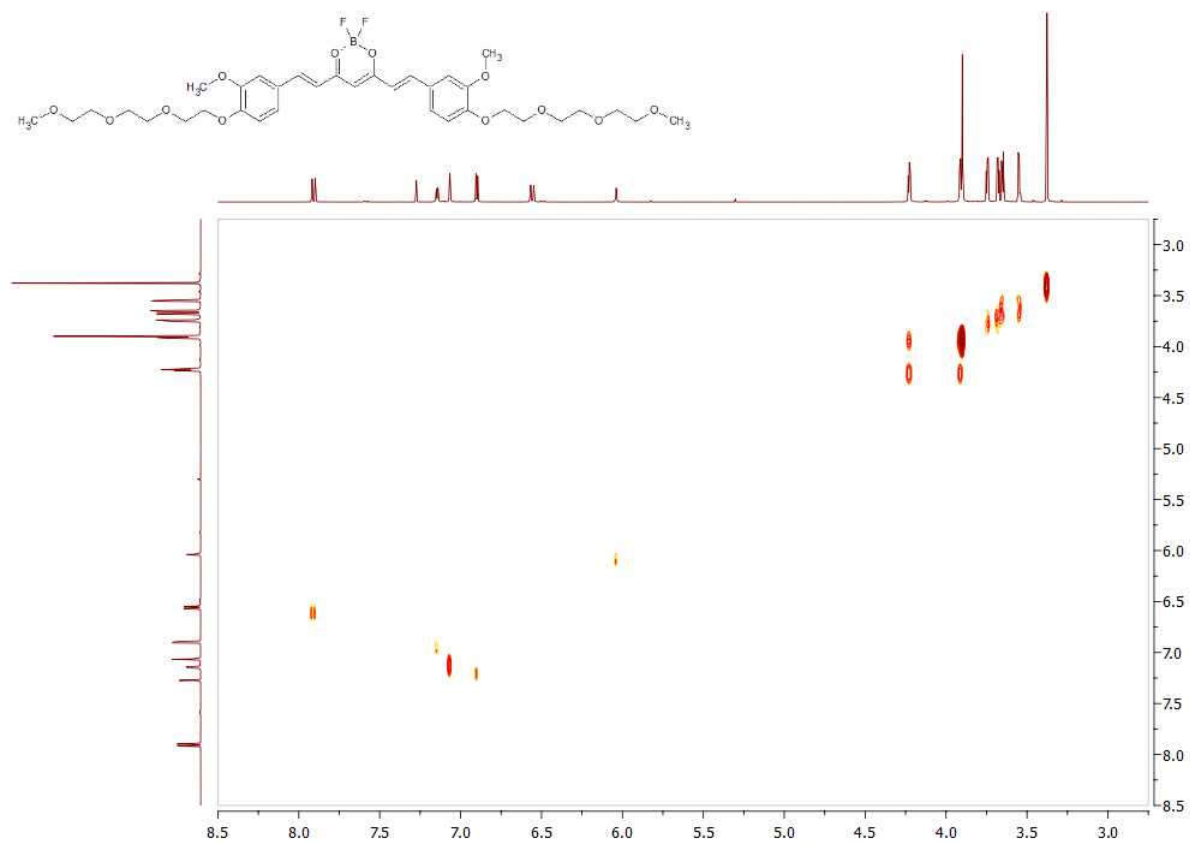

**Figure S18.** <sup>1</sup>H-<sup>1</sup>H COSY spectrum of compound 4.

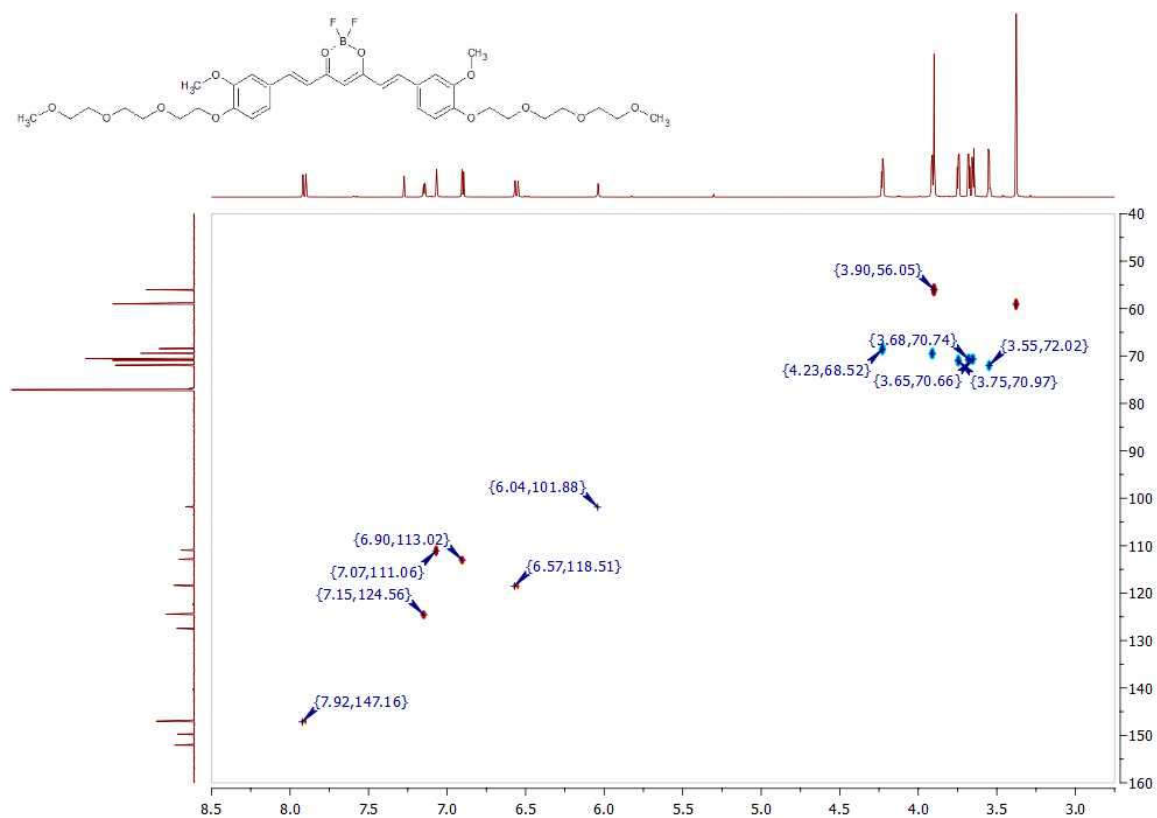

**Figure S19.** <sup>1</sup>H-<sup>13</sup>C HSQC spectrum of compound 4.



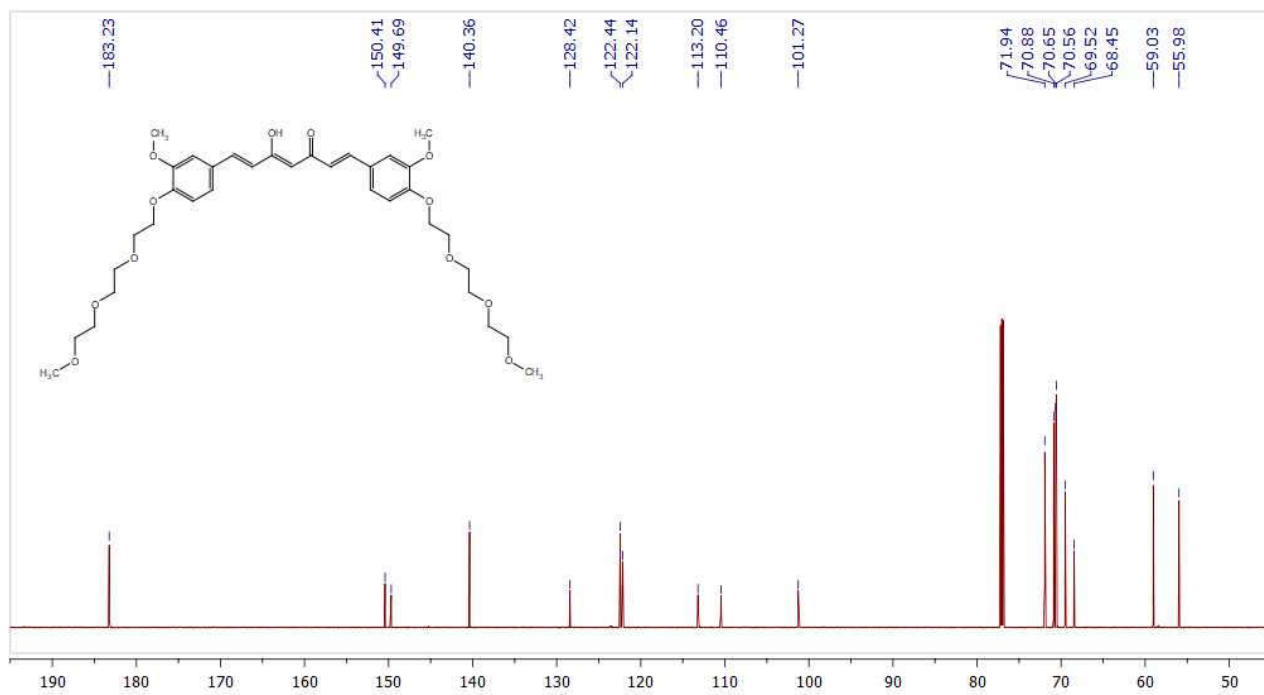

Figure S22. <sup>13</sup>C NMR spectrum of compound 5.

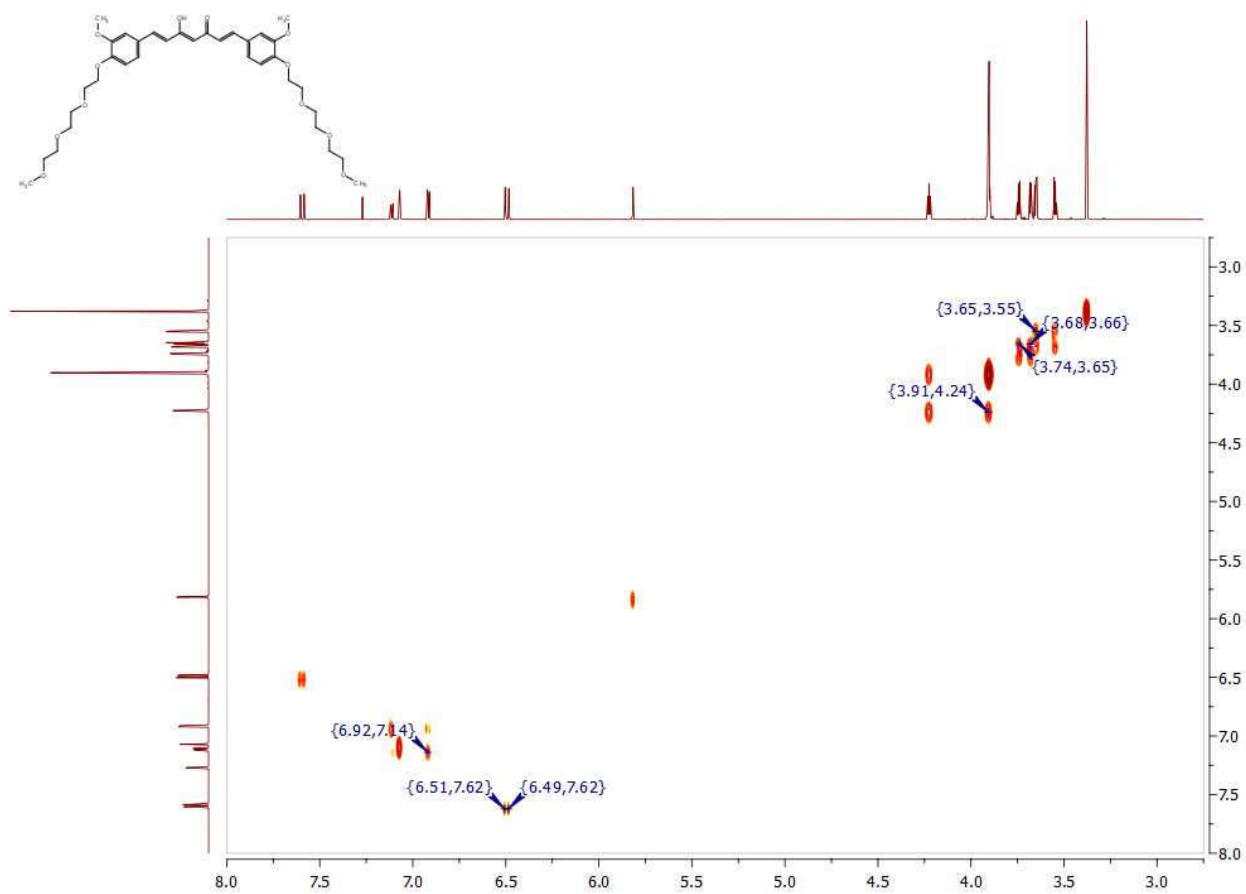

Figure S23. <sup>1</sup>H-<sup>1</sup>H COSY spectrum of compound 5.

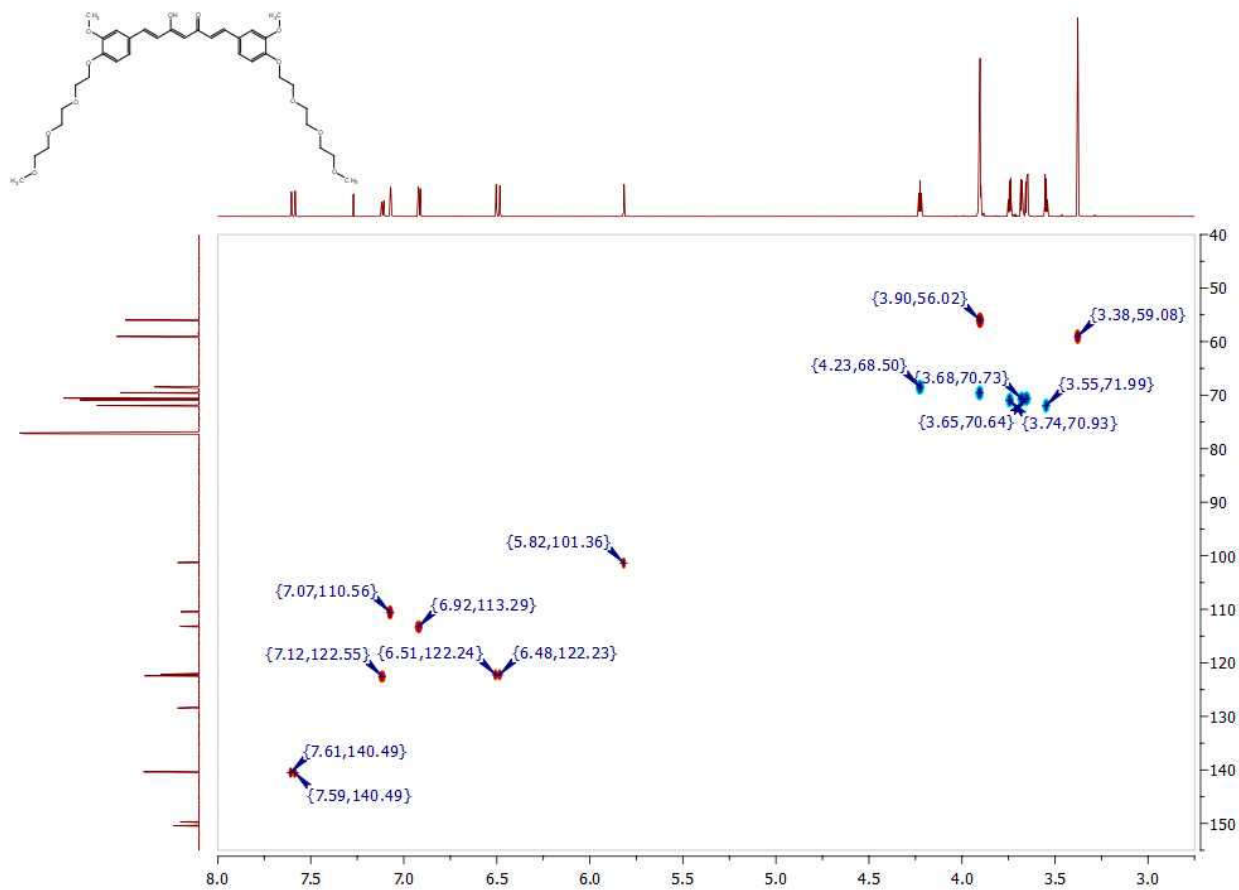

**Figure S24.**  $^1\text{H}$ - $^{13}\text{C}$  HSQC spectrum of compound **5**.

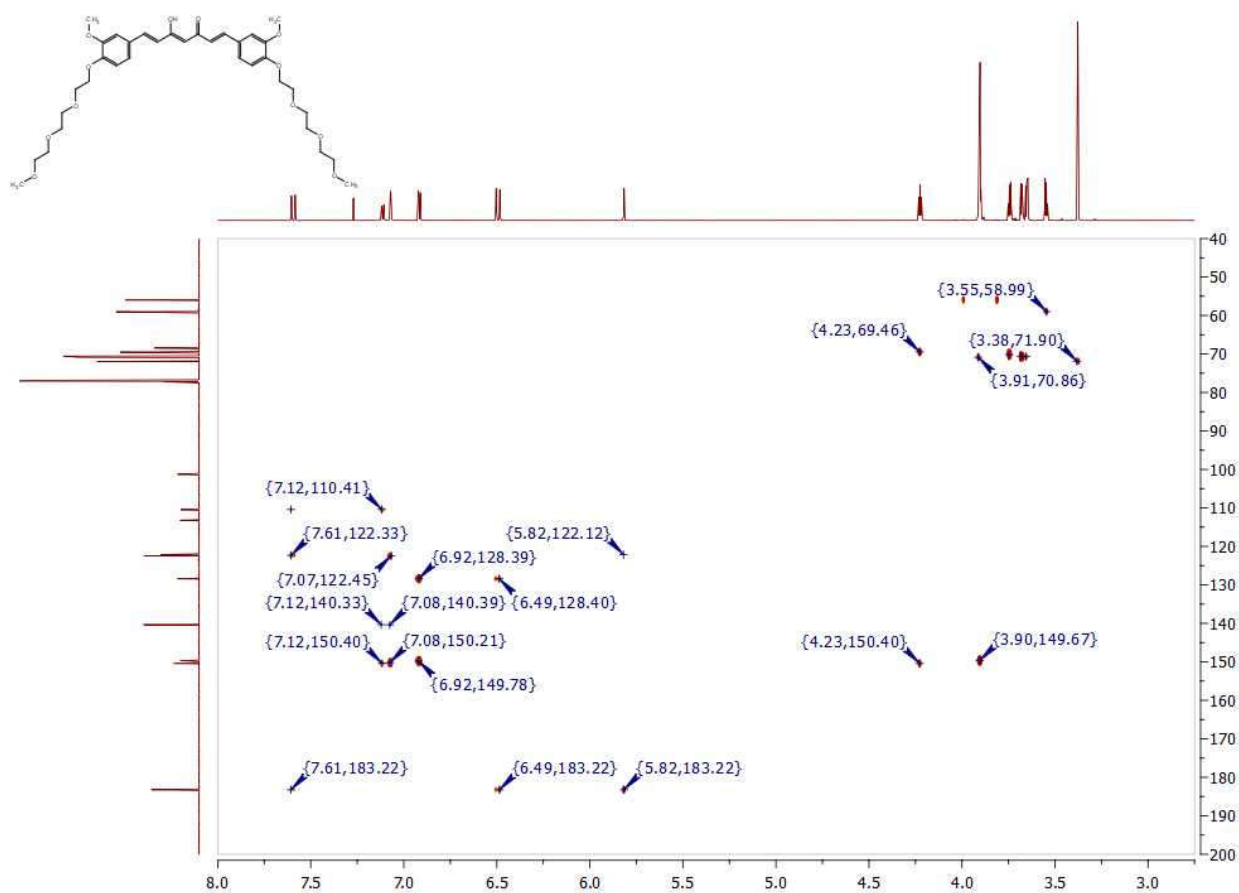

**Figure S25.**  $^1\text{H}$ - $^{13}\text{C}$  HMBC spectrum of compound **5**.

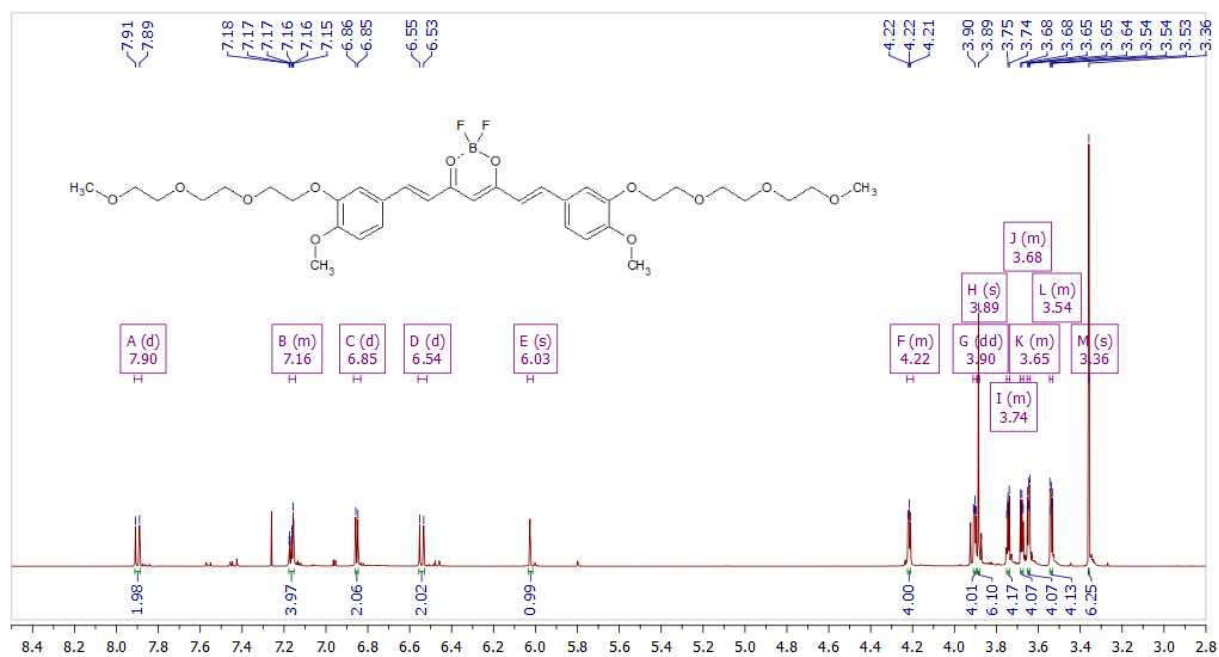

Figure S26. <sup>1</sup>H NMR spectrum of compound 6.

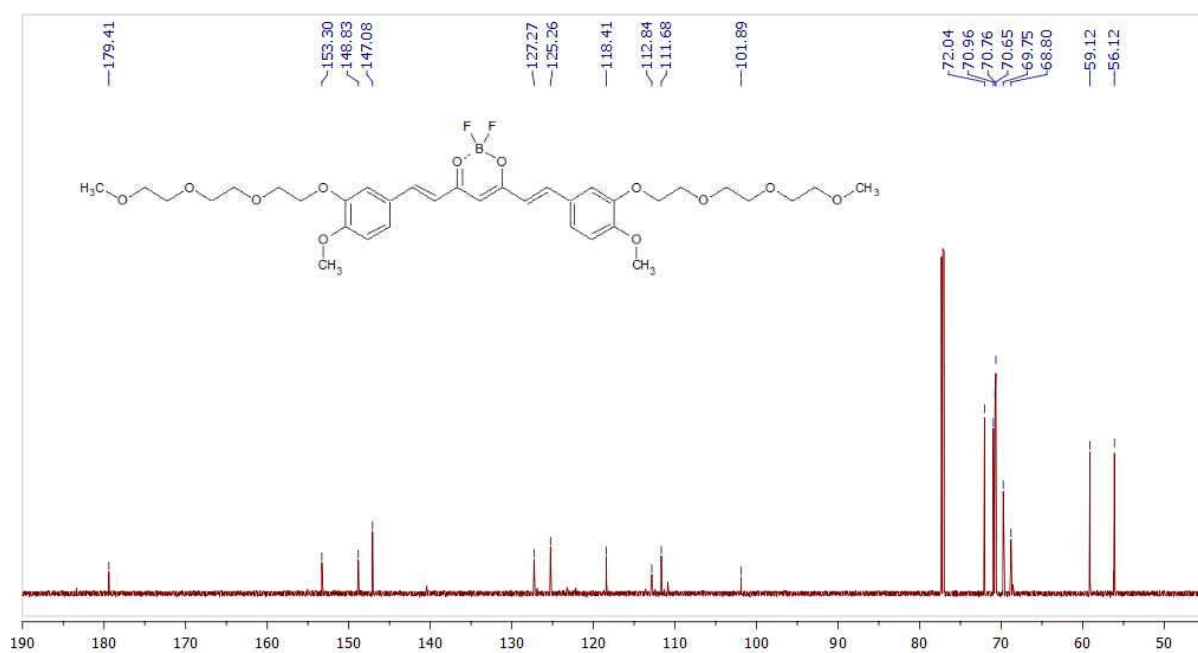

Figure S27. <sup>13</sup>C NMR spectrum of compound 6.

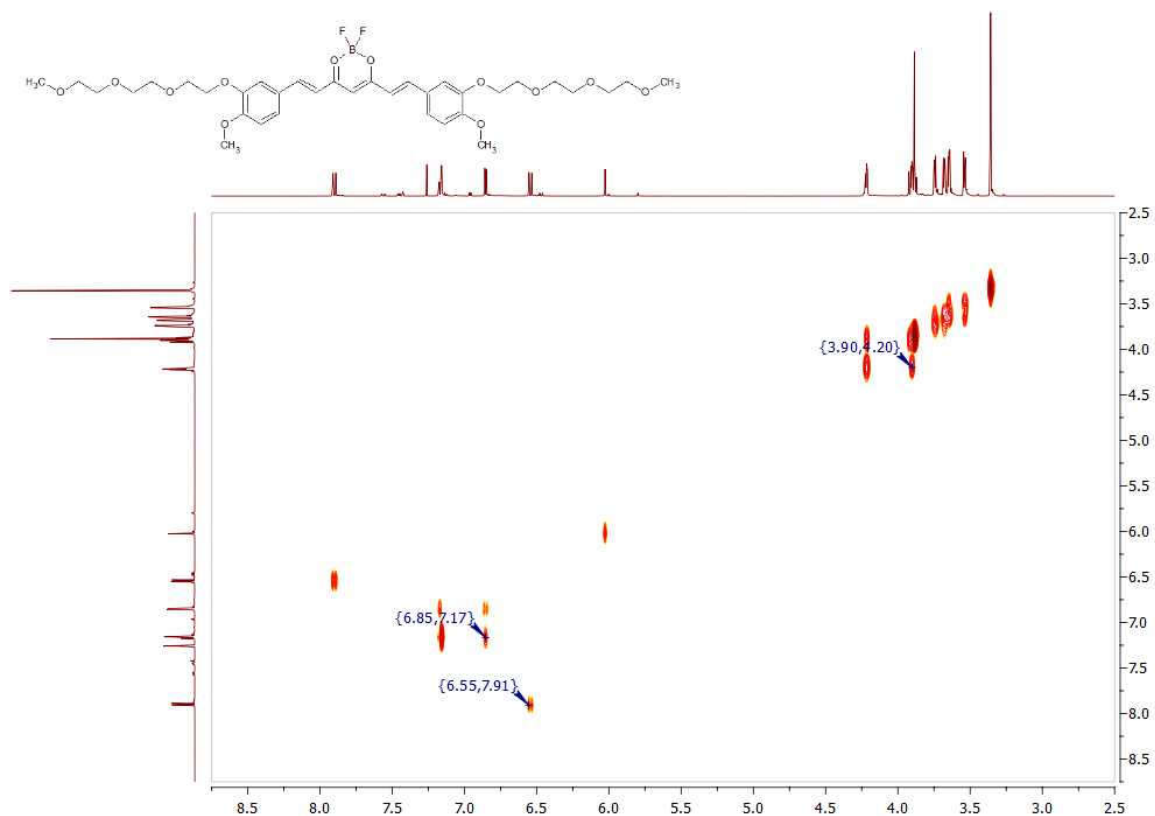

Figure S28. <sup>1</sup>H-<sup>1</sup>H COSY spectrum of compound 6.

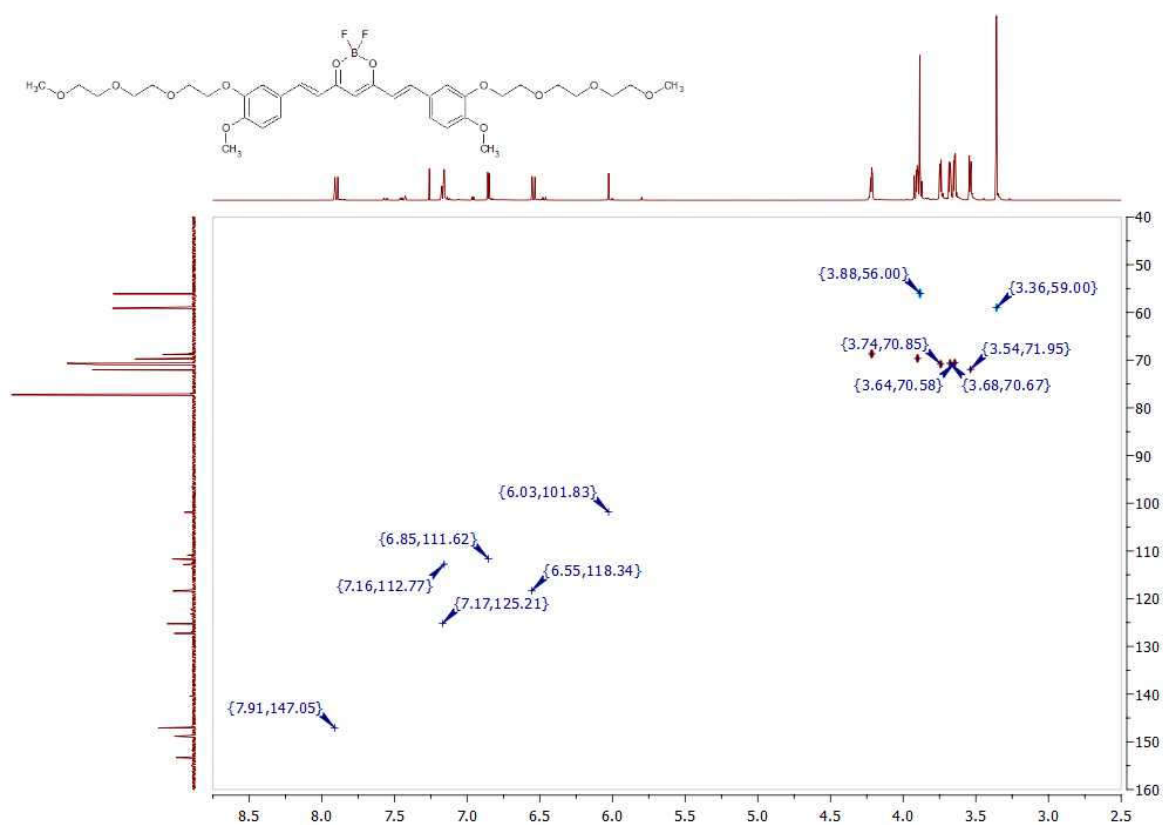

Figure S29. <sup>1</sup>H-<sup>13</sup>C HSQC spectrum of compound 6.



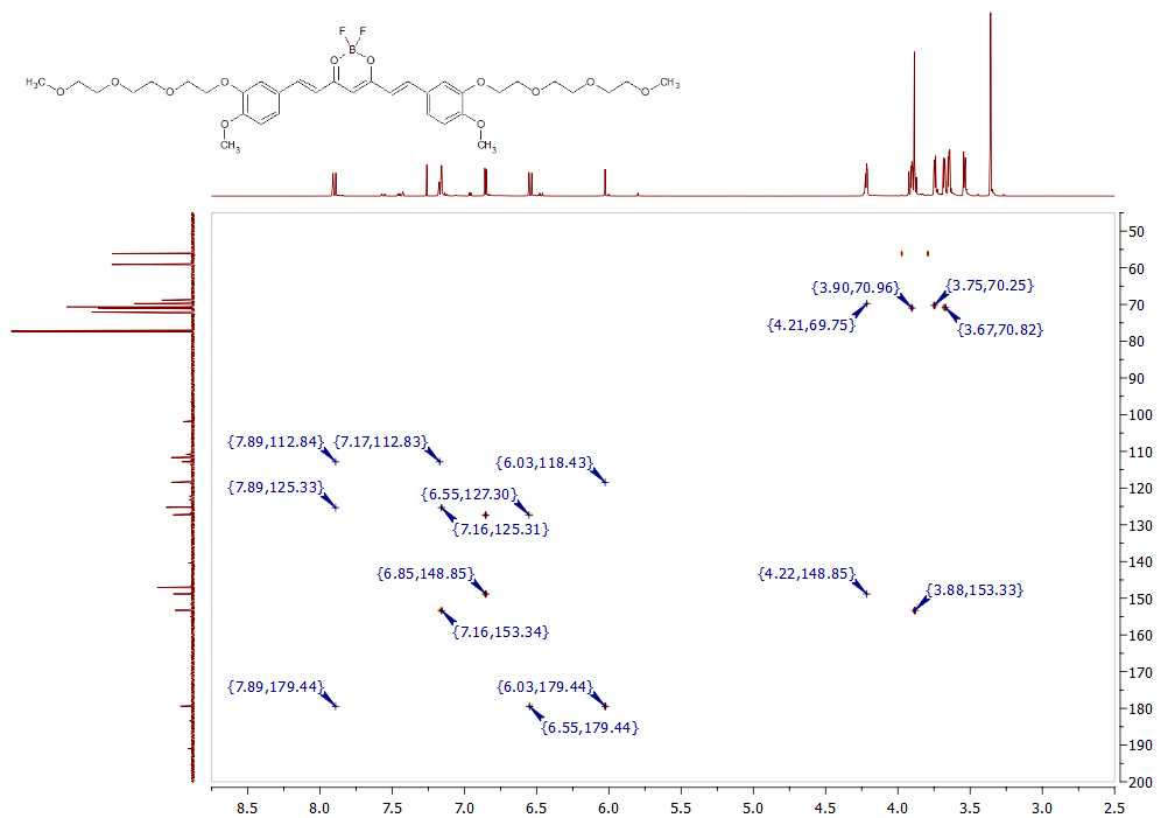

Figure S30.  $^1\text{H}$ - $^{13}\text{C}$  HMBC spectrum of compound 6.

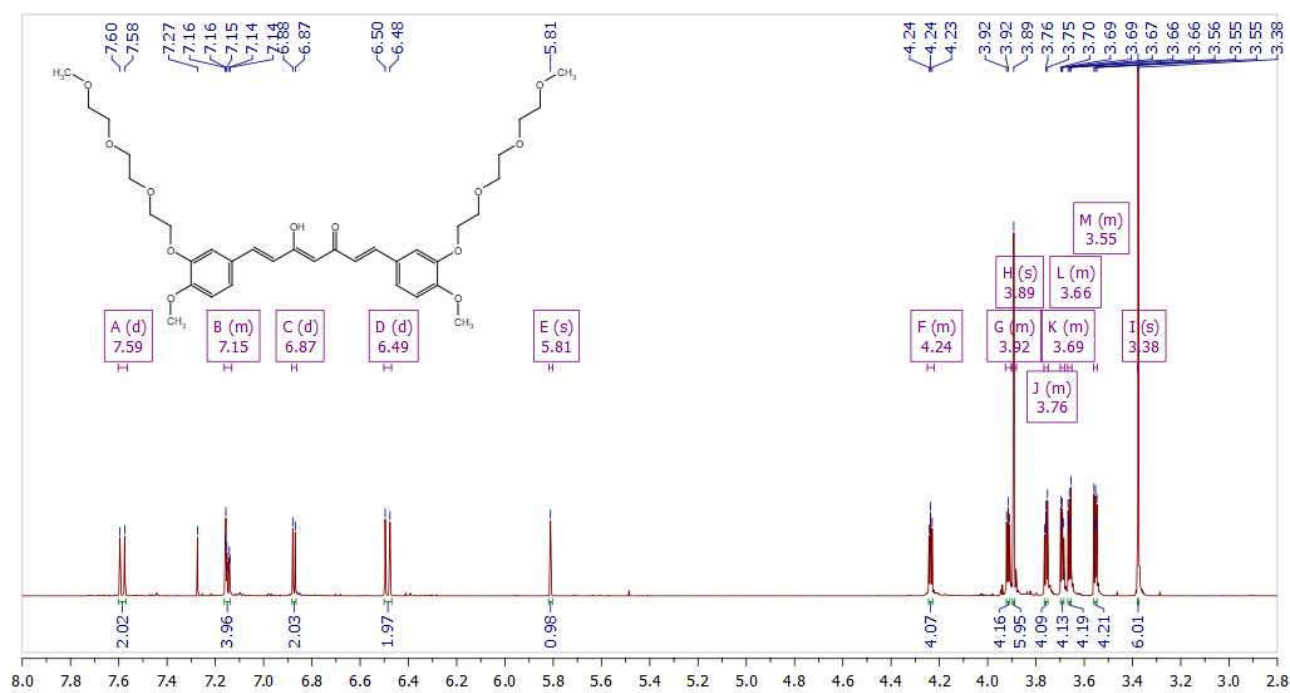

Figure S31.  $^1\text{H}$  NMR spectrum of compound 7.

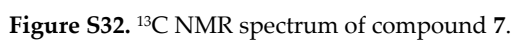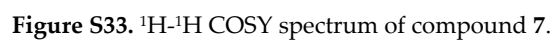





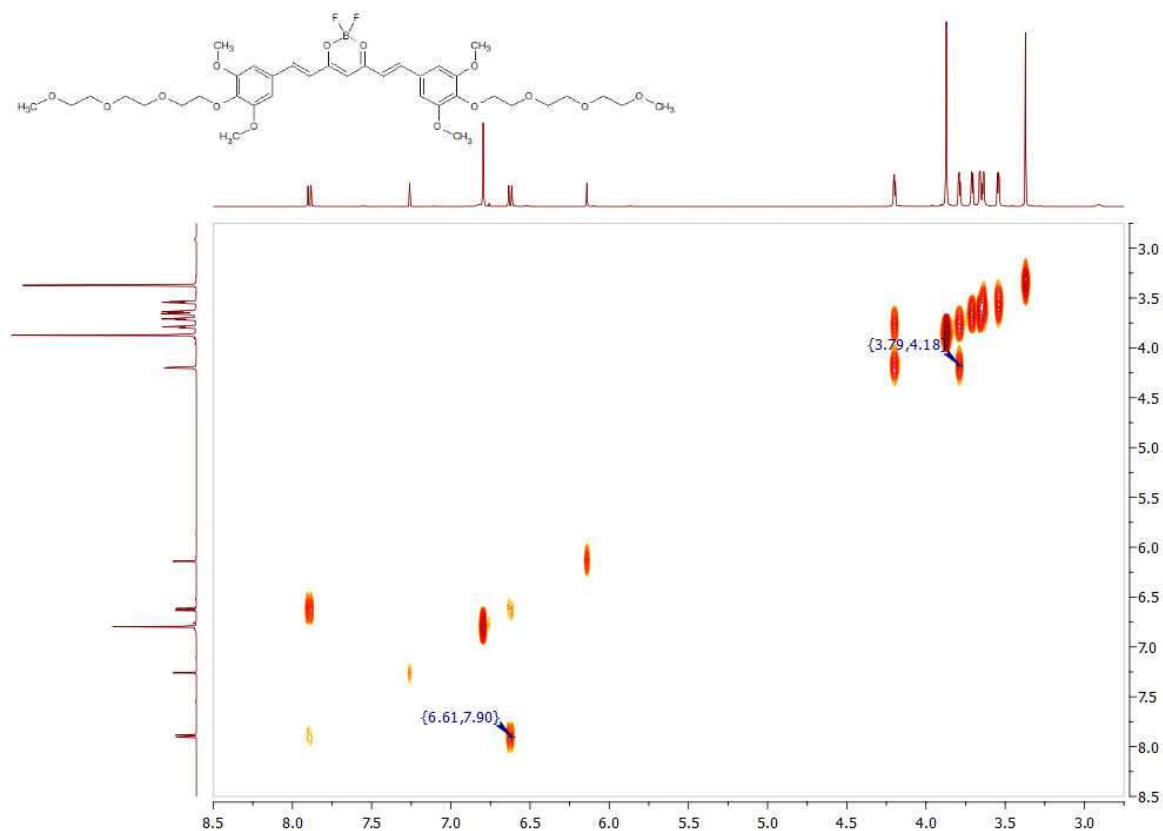

**Figure S38.**  $^1\text{H}$ - $^1\text{H}$  COSY spectrum of compound 8.

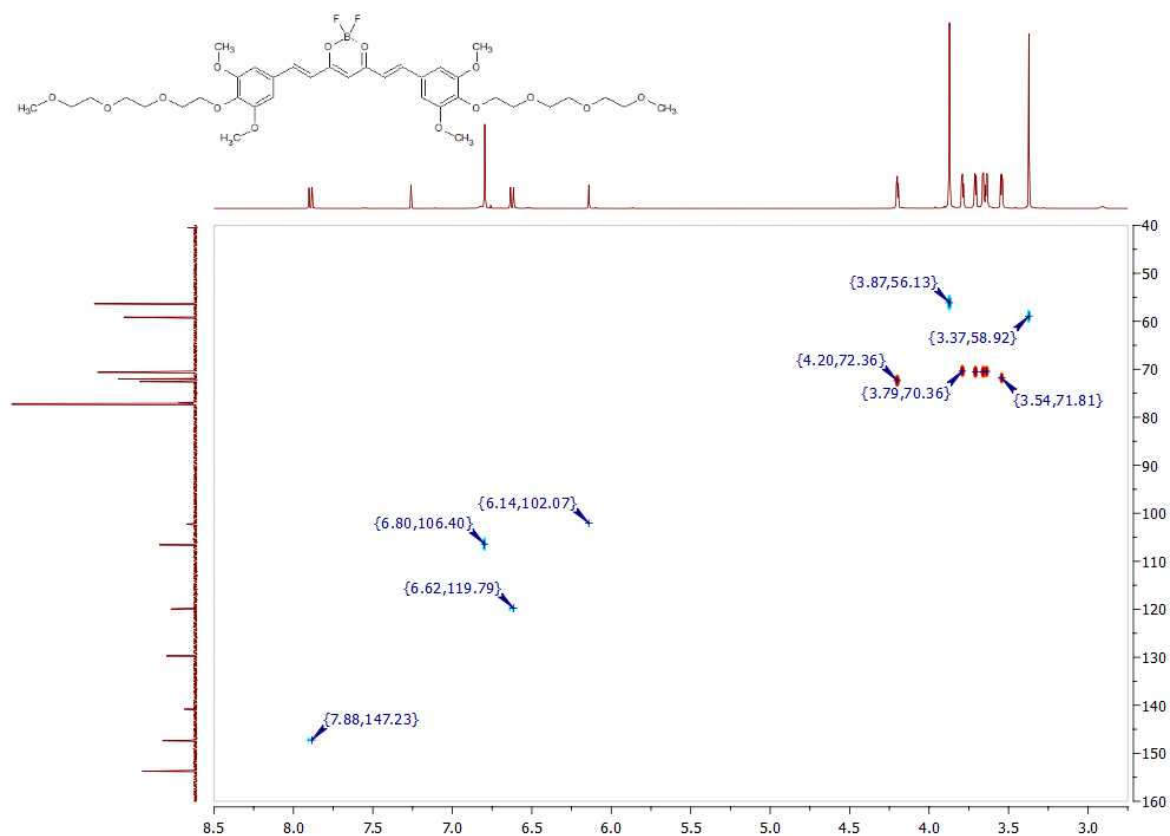

**Figure S39.**  $^1\text{H}$ - $^{13}\text{C}$  HSQC spectrum of compound 8.



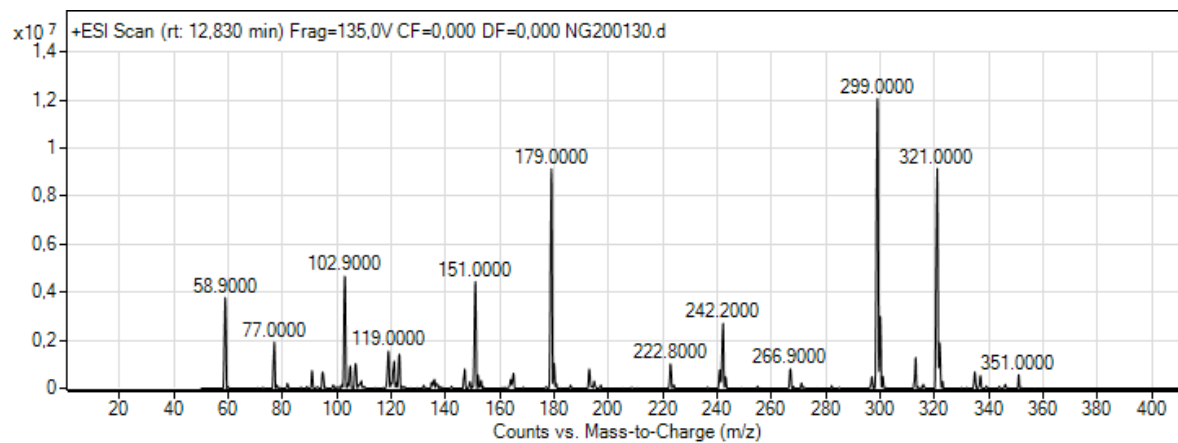

Figure S42. Mass spectra of aldehyde 2.

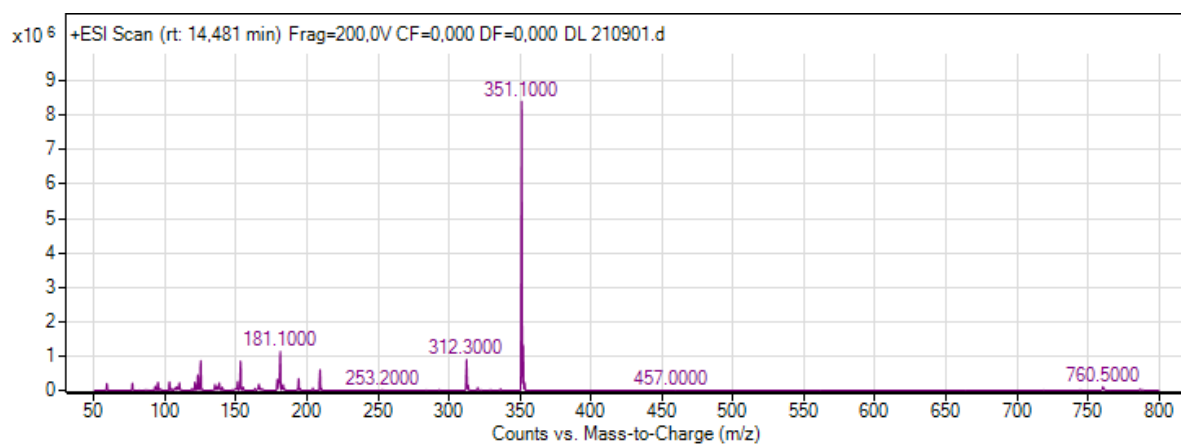

Figure S43. Mass spectra of aldehyde 3 sodium adduct.

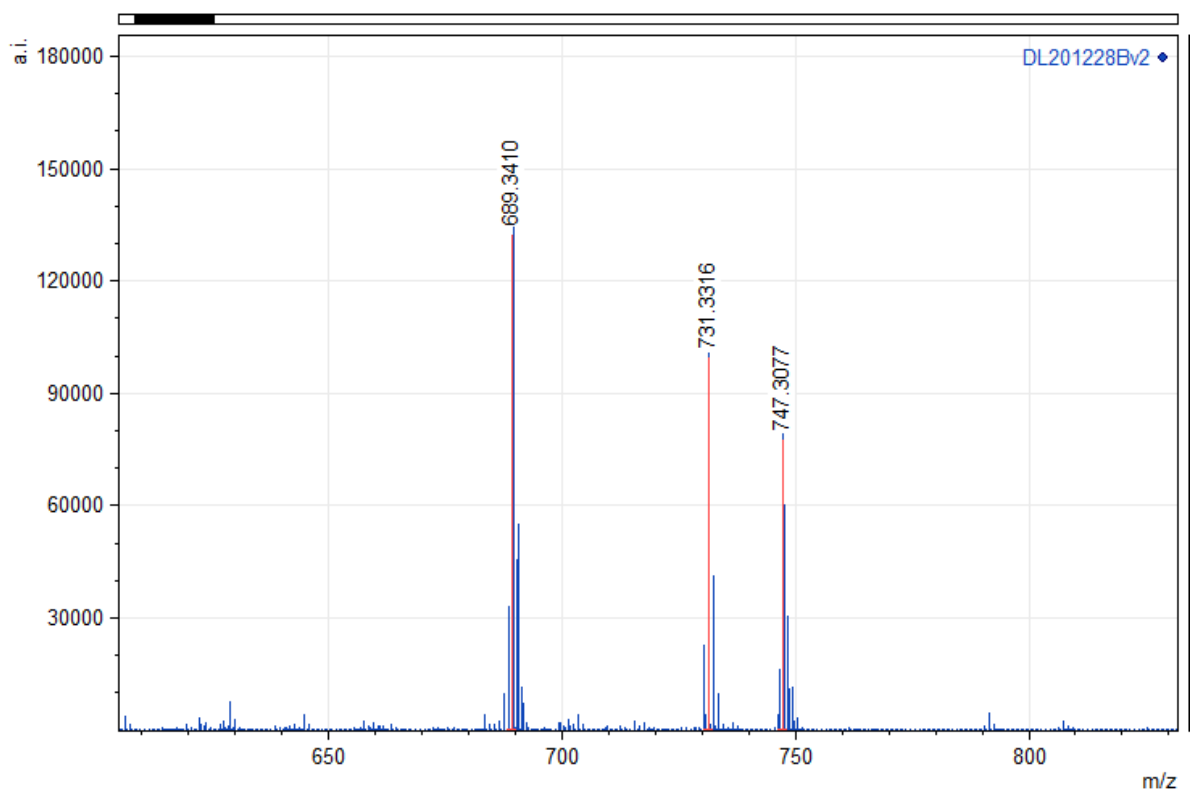

Figure S44. Mass spectrum of compound 4.

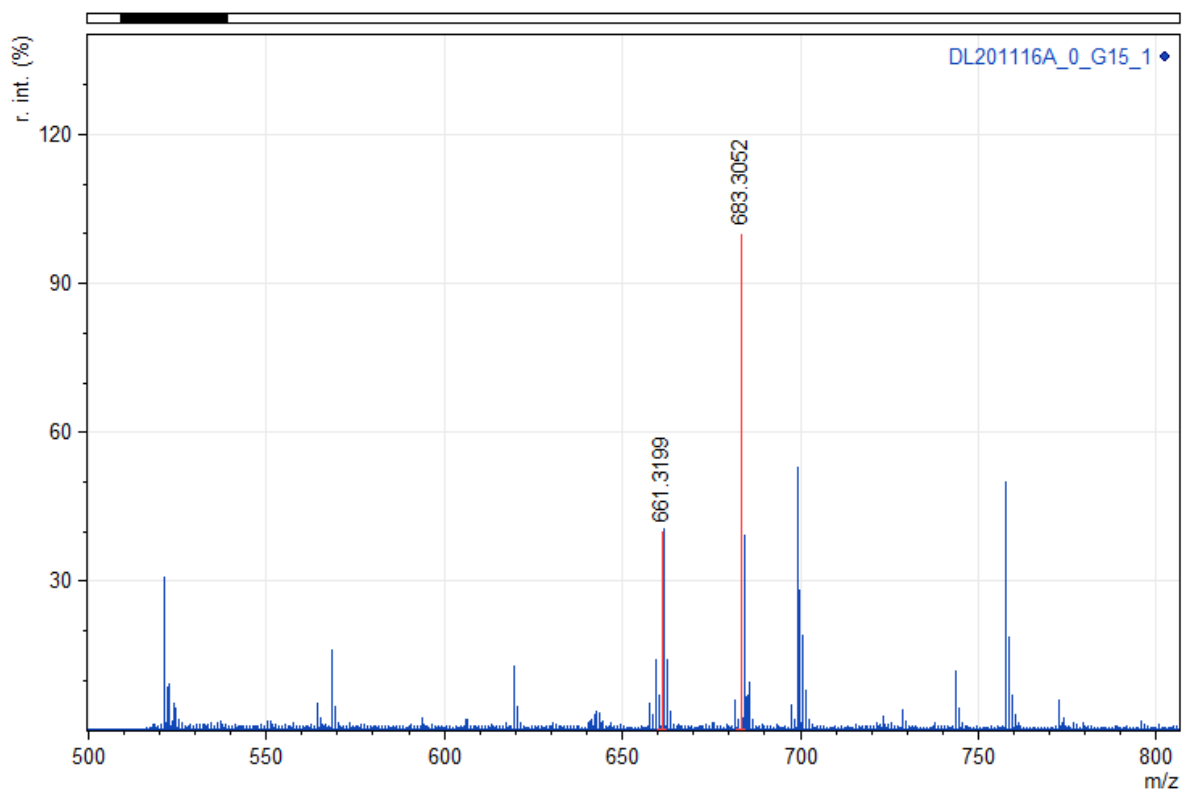

Figure S45. Mass spectrum of compound 5.

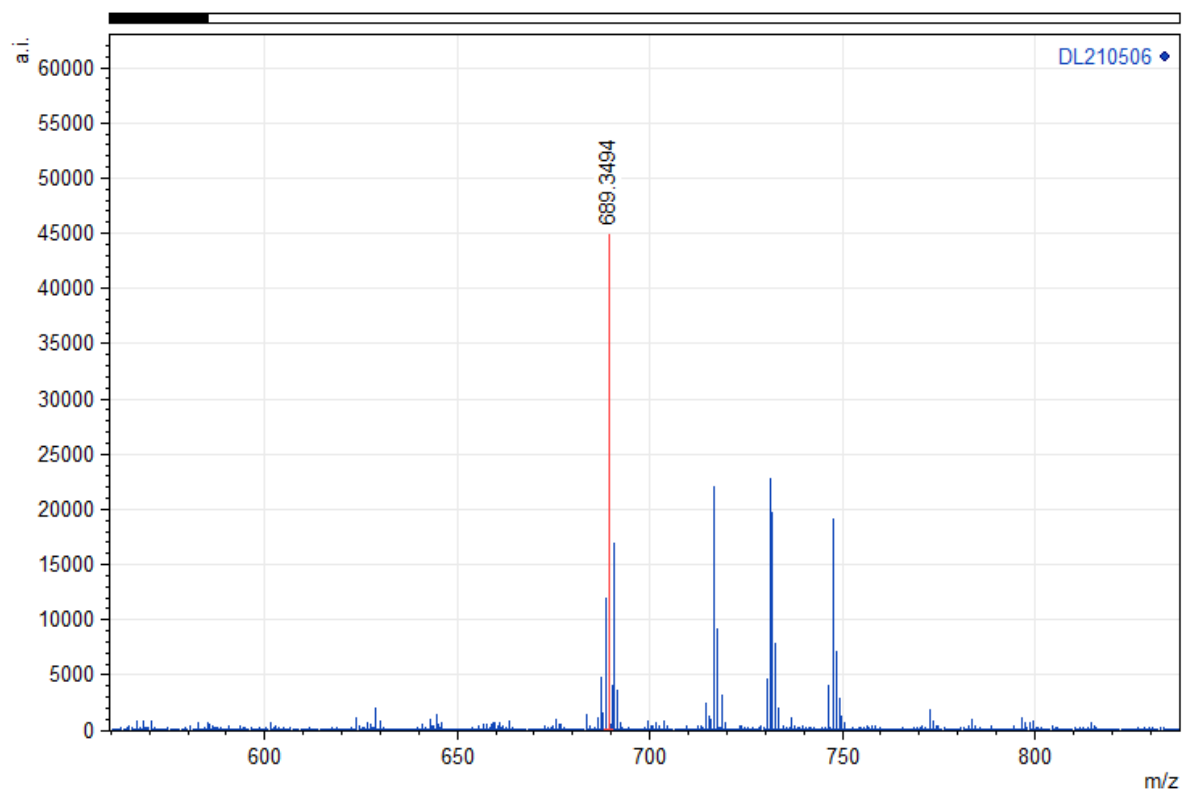

Figure S46. Mass spectrum of compound 6.



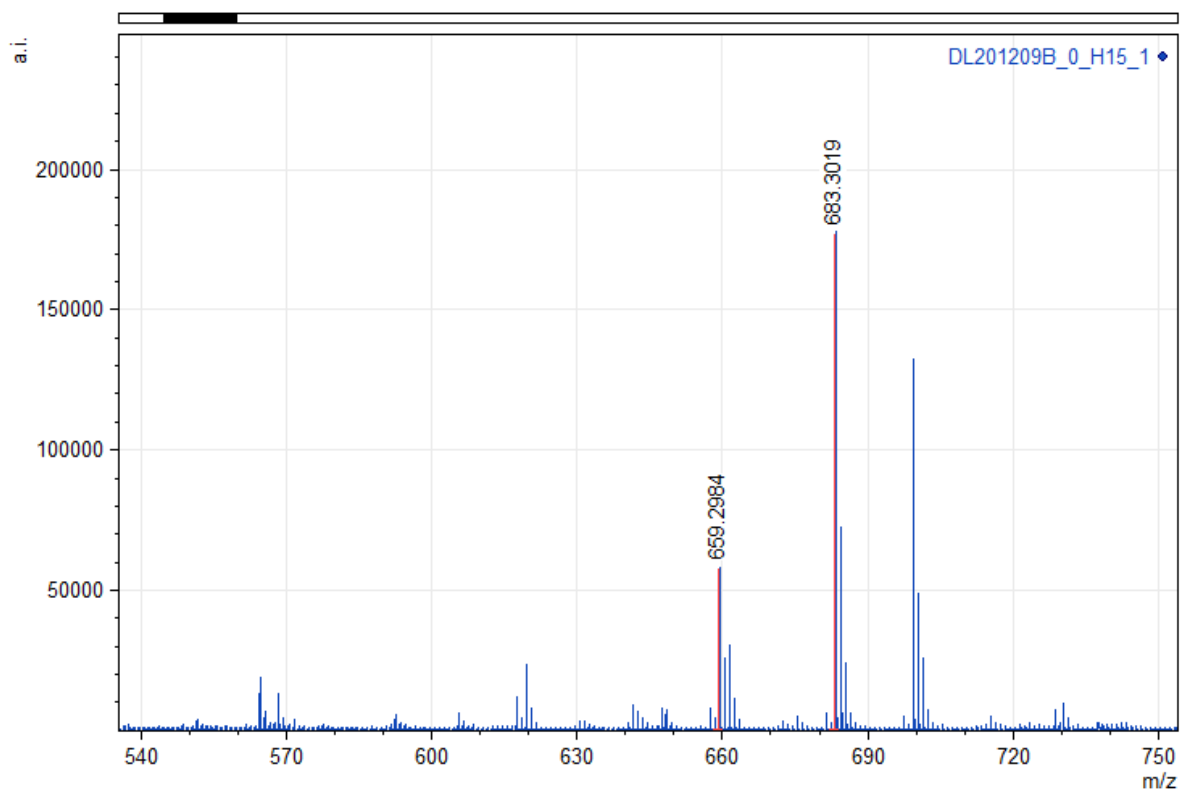

Figure S47. Mass spectrum of compound 7.

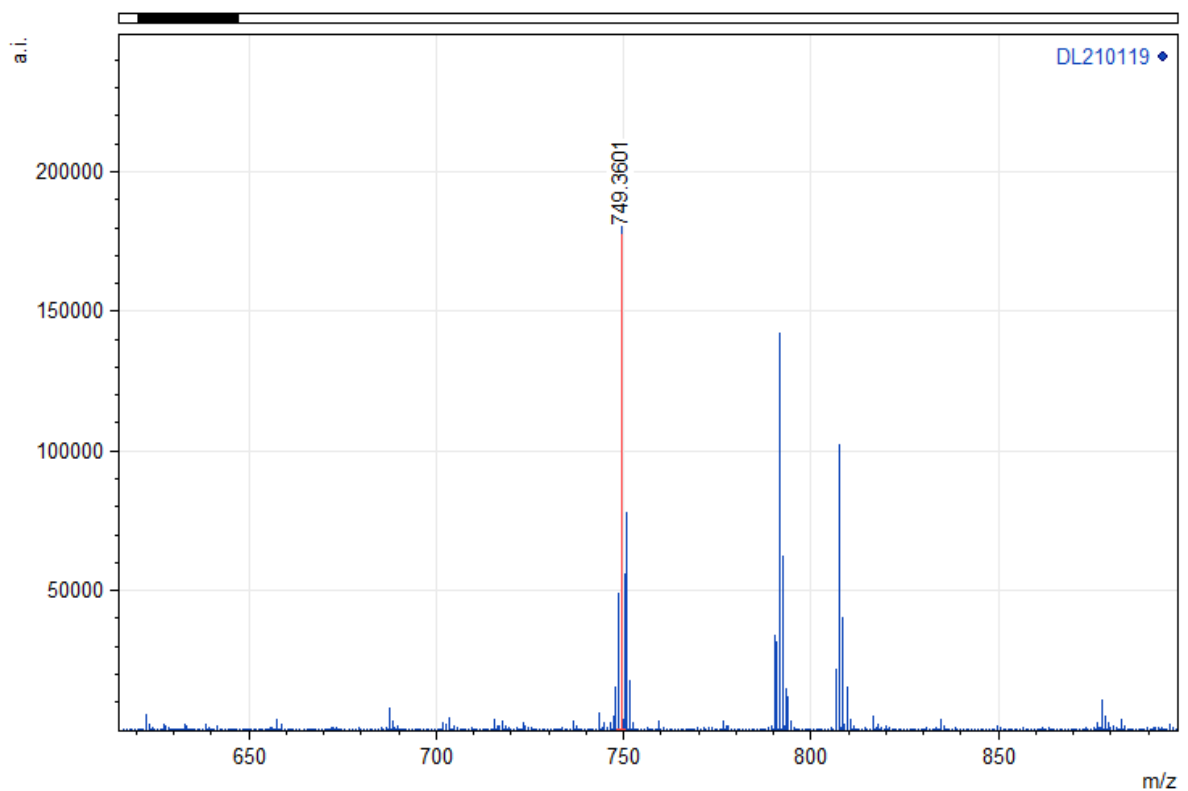

Figure S47. Mass spectrum of compound 8.

### S3 – UV-vis spectroscopy

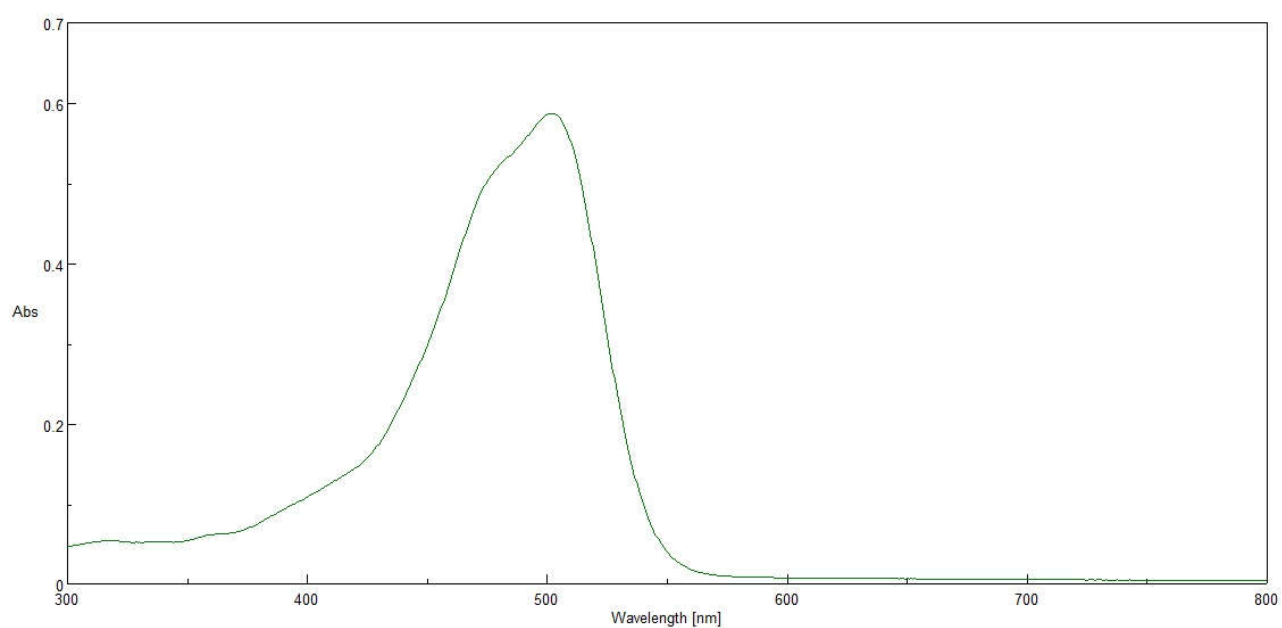

**Figure S8.** UV-vis spectrum of compound 4 in chloroform.

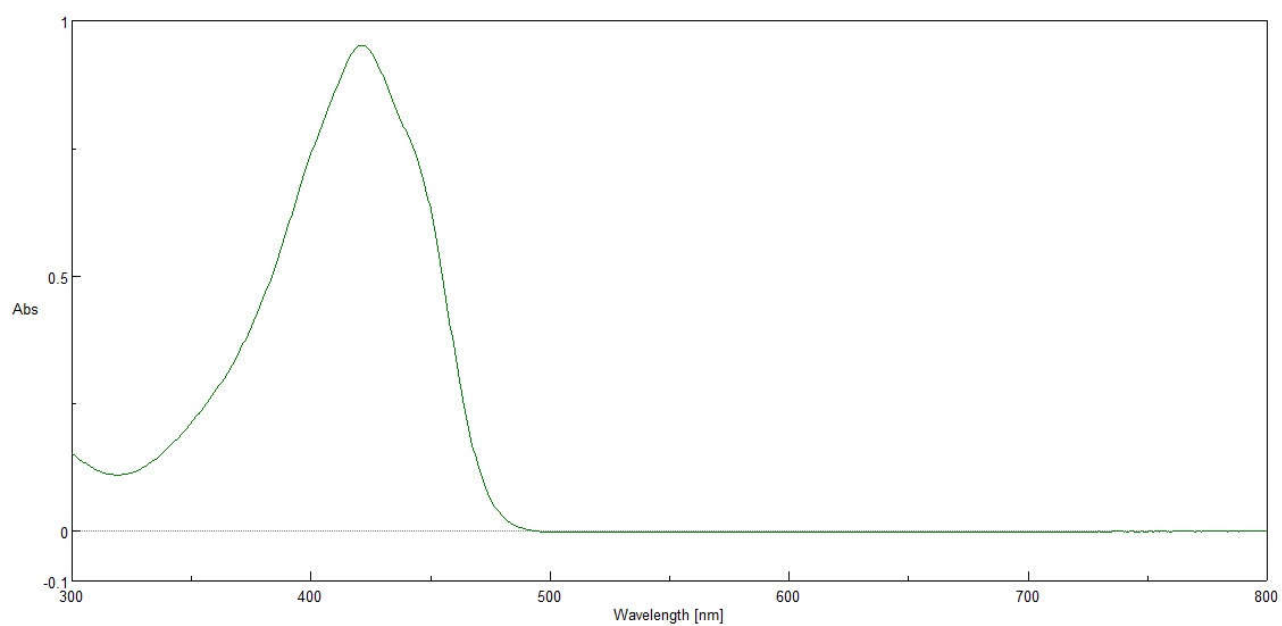

**Figure S9.** UV-vis spectrum of compound 5 in chloroform.

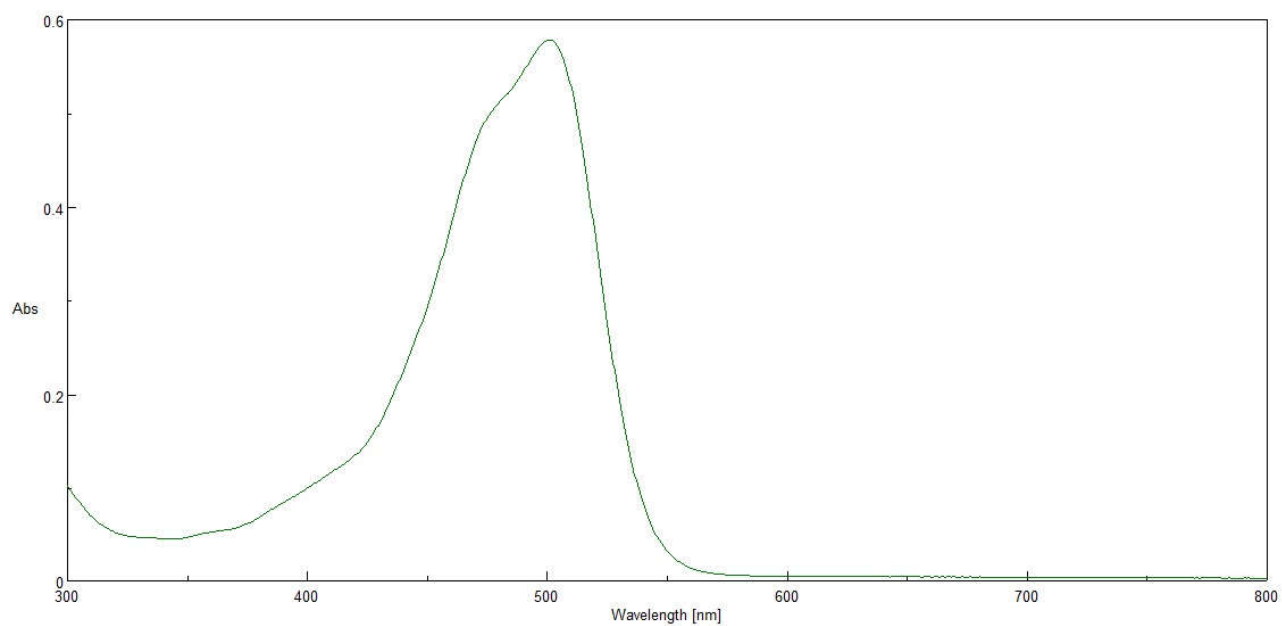

**Figure S10.** UV-vis spectrum of compound 6 in chloroform.

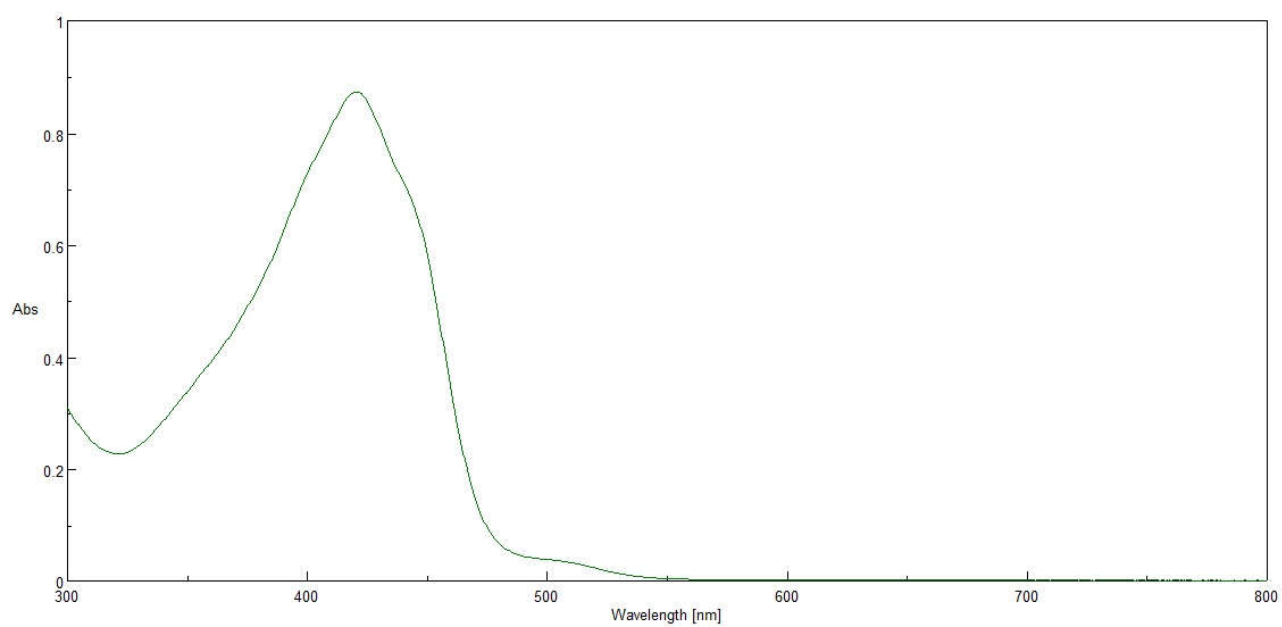

**Figure S11.** UV-vis spectrum of compound 7 in chloroform.

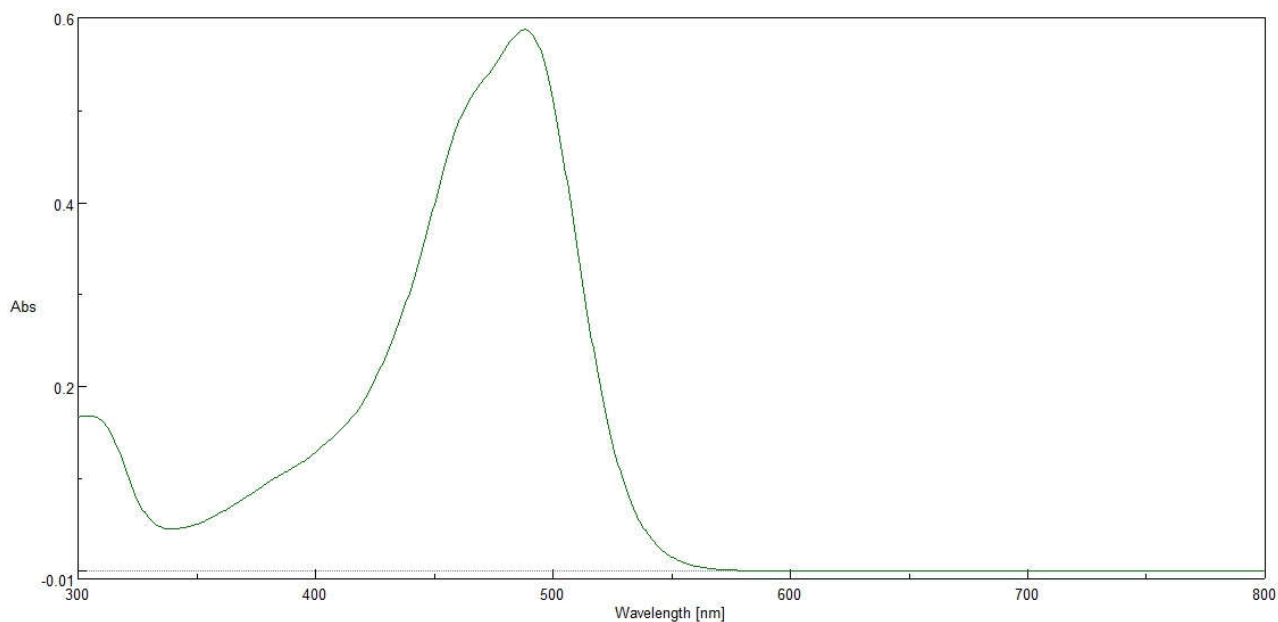

**Figure S12.** UV-vis spectrum of compound 8 in chloroform.

## S4 – HPLC data

**Table S1.** HPLC gradient used for the analysis of new synthesized compound.

| Time [min] | Phase A [%] | Phase B [%] |
|------------|-------------|-------------|
| 0          | 25          | 75          |
| 7          | 60          | 40          |
| 25         | 70          | 30          |
| 28         | 100         | 0           |
| 35         | 25          | 75          |

**Table S2.** Purity data for synthesized curcuminoids.

| Symbol | C,<br>mg/ml | $\lambda_{\text{max}}$ , nm | $t_{\text{R}}$ , min | %     |
|--------|-------------|-----------------------------|----------------------|-------|
| 4      | 0.2         | 491                         | 11.21                | 97.47 |
| 5      | 0.2         | 418                         | 12.04                | 97.38 |
| 6      | 0.2         | 502                         | 12.11                | 99.38 |
| 7      | 0.2         | 418                         | 12.77                | 97.20 |
| 8      | 0.2         | 480                         | 12.62                | 98.90 |
| 10     | 0.2         | 502                         | 9.12                 | 98.81 |
| 11     | 0.2         | 424                         | 9.58                 | 99.41 |
| 12     | 0.2         | 492                         | 9.26                 | 98.59 |
| 13     | 0.2         | 418                         | 9.56                 | 99.42 |
